# Supplementary material for: Fermentation stage-dependent adaptations of Bacillus licheniformis during enzyme production
Source: PubMed Central journal article supplement (PMC3878961; doi:10.1186/1475-2859-12-120), 2013-12-06
Supplement: 1475-2859-12-120-S1.pdf [file 1475-2859-12-120-S1.pdf]

# Additional File 1

## Fermentation stage-dependent adaptations of *Bacillus licheniformis* during enzyme production

Sandra Wiegand, Birgit Voigt, Dirk Albrecht, Johannes Bongaerts, Stefan Evers,  
Michael Hecker, Rolf Daniel and Heiko Liesegang

### Content

|                                                                     |    |
|---------------------------------------------------------------------|----|
| Figure S1 Protease production and process parameters.....           | 2  |
| Figure S2 Proteome of the amino acid metabolism – Part I.....       | 3  |
| Figure S3 Proteome of the amino acid metabolism – Part II.....      | 4  |
| Figure S4 Amino acid transport.....                                 | 5  |
| Figure S5 Proteome of the central carbon metabolism.....            | 7  |
| Figure S6 Carbohydrate transport.....                               | 8  |
| Figure S7 Acetoin utilization operon <i>acuABC</i> .....            | 10 |
| Figure S8 Most abundant proteins.....                               | 10 |
| Figure S9 Lichenicidin gene cluster.....                            | 11 |
| Figure S10 Cell envelope stress response.....                       | 12 |
| Figure S11 Sporulation.....                                         | 14 |
| Figure S12 Iron starvation.....                                     | 22 |
| Figure S13 Heat shock response.....                                 | 23 |
| Figure S14 Phosphate starvation response.....                       | 24 |
| Figure S15 Putative Tat signal peptide of Subtilisin Carlsberg..... | 25 |
| References.....                                                     | 26 |

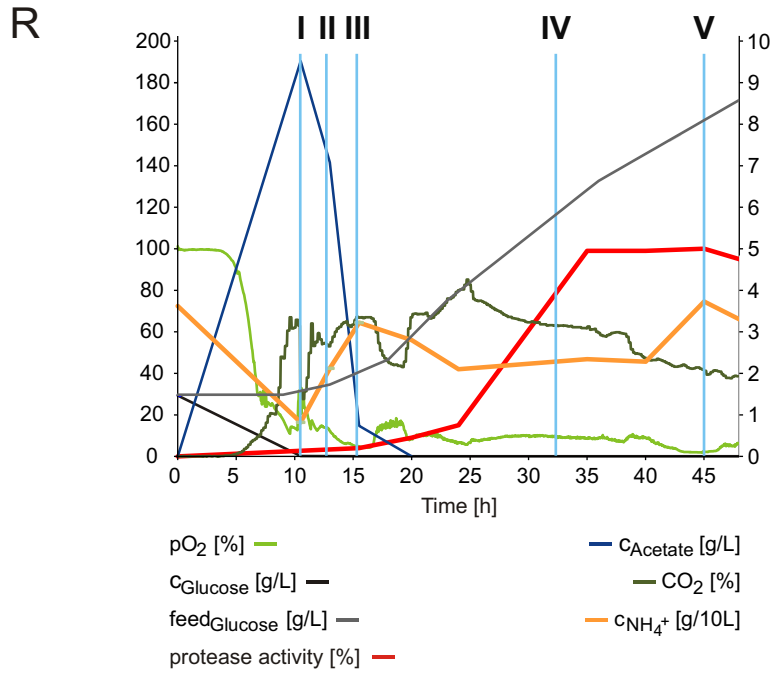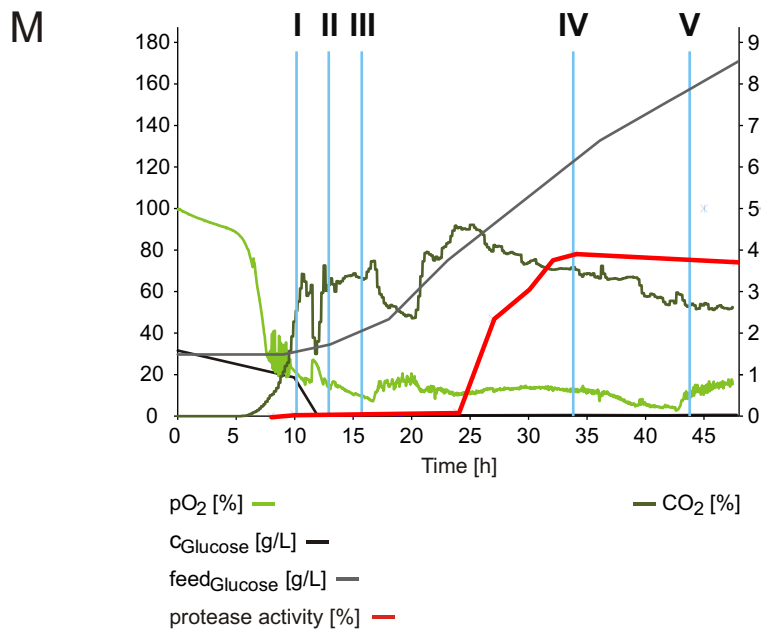

**Figure S1 Protease production and process parameters.** Process parameters are shown for fermentations R and M (please refer to Figure 1 for replicate L). Oxygen partial pressure  $pO_2$  [%], glucose concentration  $c_{Glucose}$  [g/L], supplied glucose  $feed_{Glucose}$  [g/L] and normalized protease activity [%] are displayed on the left y-axis, whereas acetate concentration  $c_{Acetate}$  [g/L] (only for fermentation R), carbon dioxide content  $CO_2$  [%], and ammonium concentration  $c_{NH_4^+}$  [g/10L] (only for fermentation R) are scaled on the right y-axis. Process time  $t$  [h] is given on the x-axis. The sampling points I to V are indicated by light blue lines.

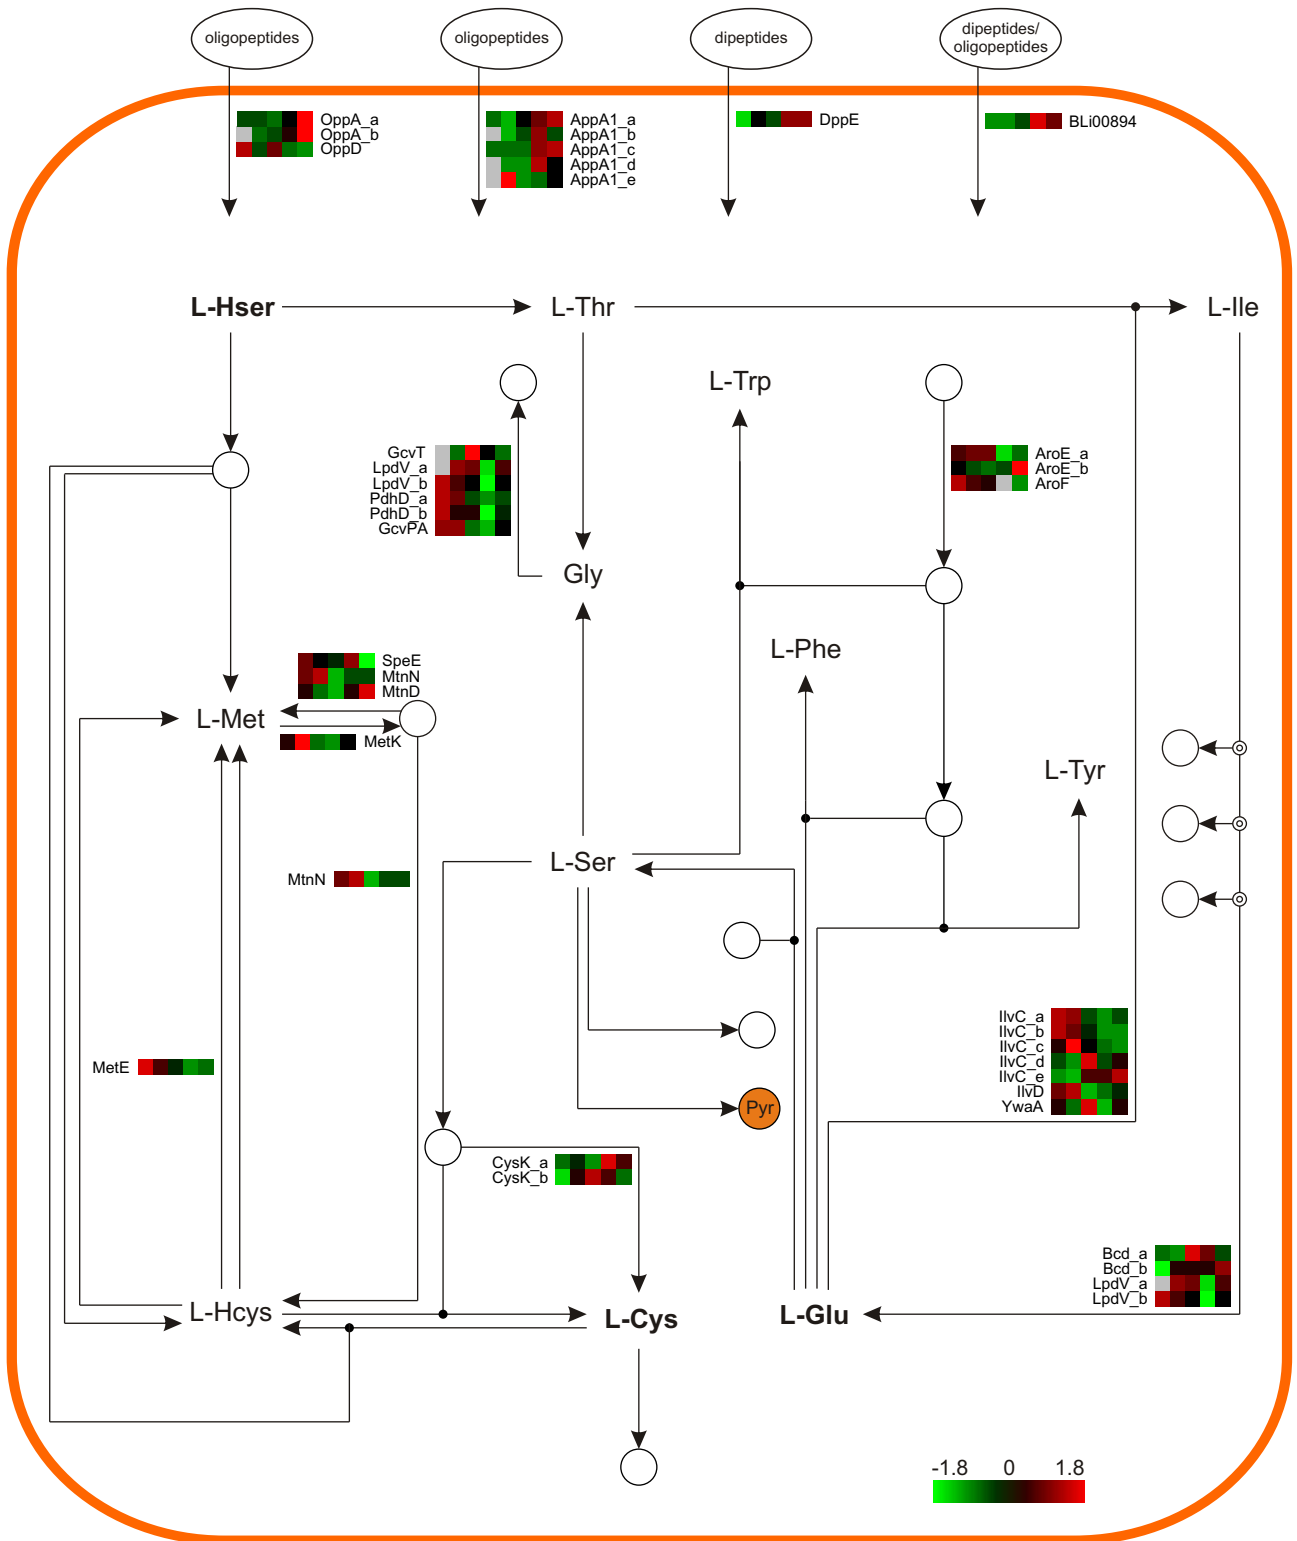

**Figure S2 Proteome of the amino acid metabolism – Part I.** Heat map representation of Z-score transformed protein spot volumes of proteins involved in amino acid transport and metabolism. In cases where a specific protein is assigned to more than one spot, the particular spots are indicated by an underscore, followed by an ordering letter. Statistically not significant values are indicated by light grey boxes. Pyr: Pyruvate. For the corresponding transcriptome data please refer to Figure 5.



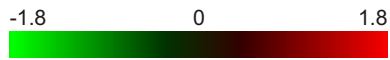

(A)

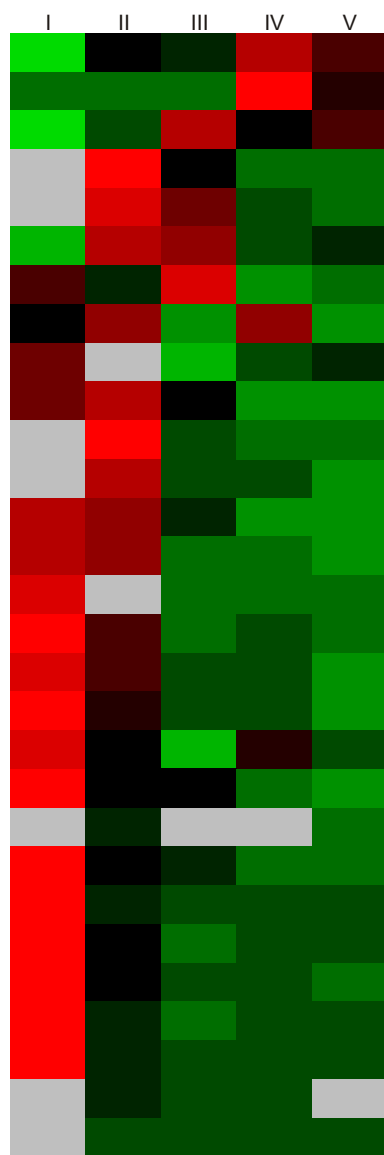

- gltP* proton/glutamate symport protein
- ycgF* putative amino acid efflux protein
- yflA1* sodium/alanine symporter
- ycgO1* sodium/proline symporter
- yflA2* sodium/alanine symporter
- cstA* putative peptide import permease
- dltB* D-alanine transfer protein
- BLi02238 lysine exporter protein
- BLi03380 amino acid carrier protein
- alsT* amino acid carrier protein
- rocE* amino acid permease
- BLi02203 putative amino acid transporter
- blt* spermidine-efflux transporter
- yclF* putative oligopeptide transporter
- gltT* proton/sodium-glutamate symport protein
- azlC* putative branched-chain aminoacid transporter
- ycgO2* sodium/proline symporter
- yodF* Na<sup>+</sup>/solute symporter
- trpP* tryptophan transporter
- ybxG* amino acid permease
- tcyP* sodium/cystine symporter
- BLi00817 putative sodium-alanine symporter
- ybgF* putative amino acid permease
- ydgF* putative amino acid permease
- opuD* glycine betaine transporter
- opuE* sodium/proline symporter
- nrgA* ammonium transporter
- BLi01175 ammonium transporter
- braB* branched-chain amino acid transport system carrier protein

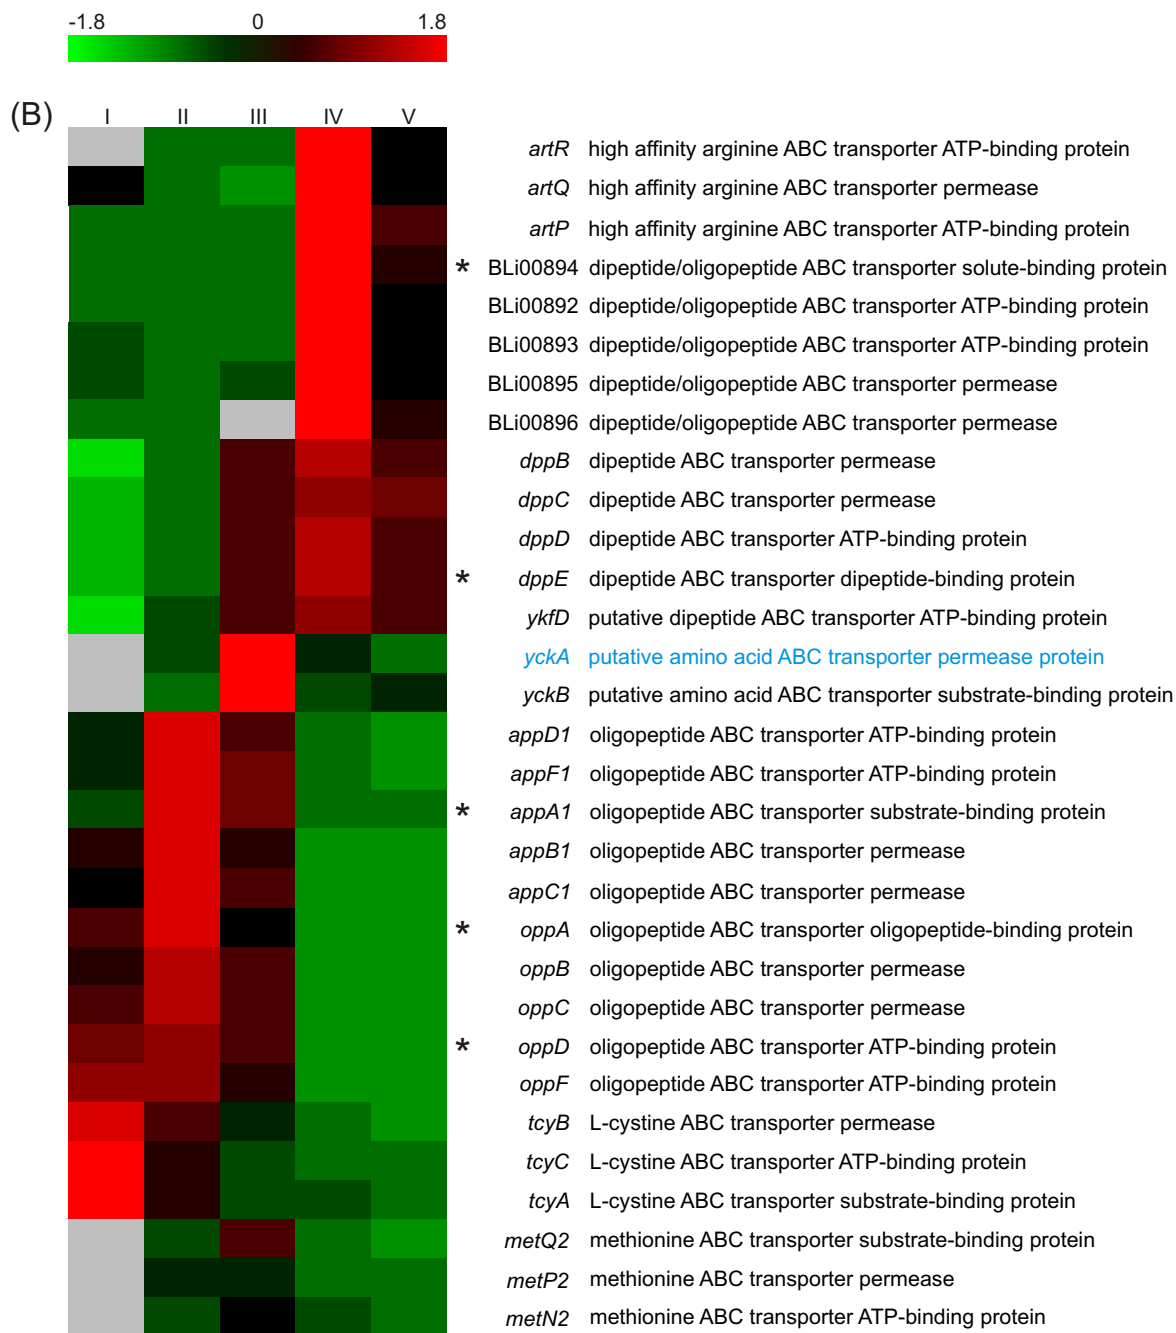

**Figure S4 Amino acid transport.** Heat map representation of Z-score transformed NPKM values. The depicted genes have been annotated as (A) amino acid or nitrogen transporters and (B) amino acid ABC transporter components. Please note that the figure does not give a complete list of genes involved in amino acid transport. Genes with an assigned antisense RNA [1] are marked in blue, asterisks indicate a detected protein spot for the respective gene (Additional File 2: Table S3) and statistically not significant values are marked by grey boxes. Transporter genes with high transcript abundances during the early stages of the fermentation process are for example encoding a tryptophan transporter (*trp*), cystine (*tcyABC*) and methionine (*metNPQ*) ABC transporters and diverse proteins for uptake of alanine or unspecific amino acids. Additionally, the transcript of the ammonium transporter *NrgA*, especially required for ammonium transport at low ammonium concentrations in *B. subtilis* [2], is highly abundant at sampling point I. The only operon besides the dipeptide ABC transporters mentioned in the main text with distinct transcript abundance at the later sampling points encodes a high-affinity arginine ABC transporter (*artPQR*).

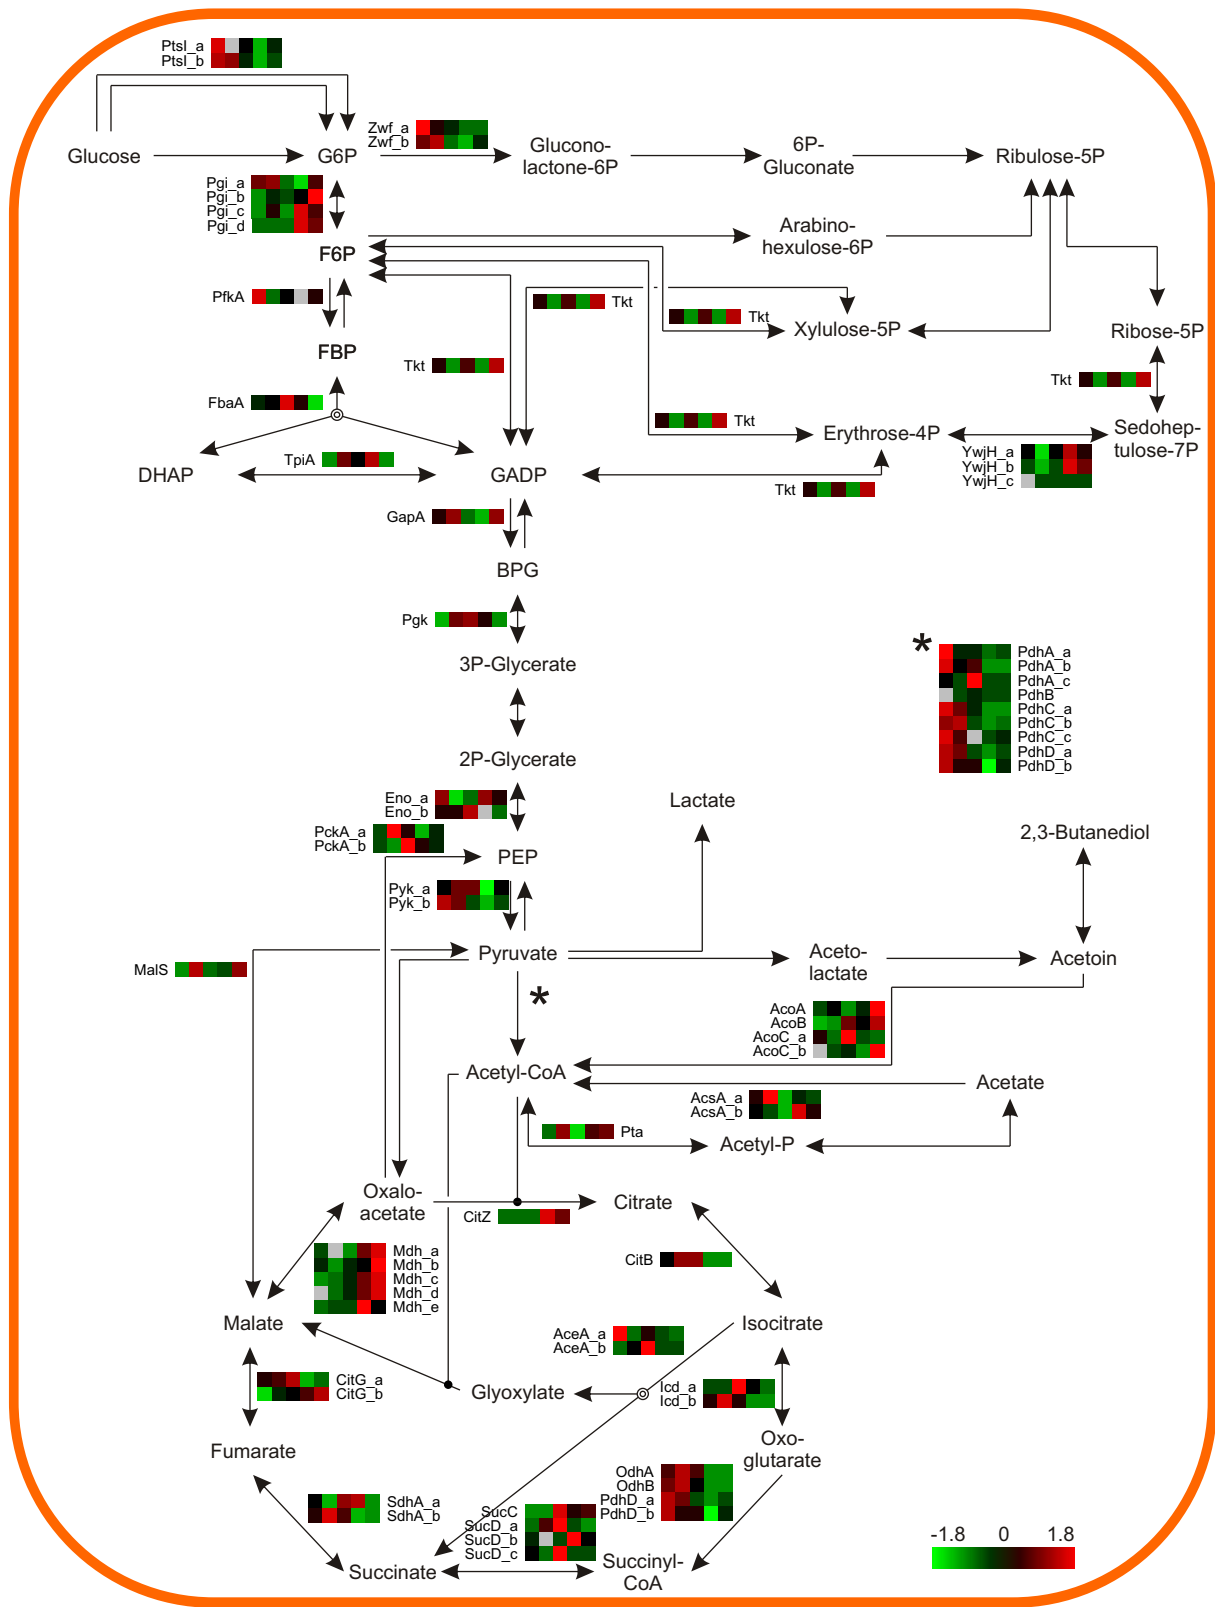

**Figure S5 Proteome of the central carbon metabolism.** Heat map representation of Z-score transformed protein spot volumes of proteins involved in central carbon metabolism. In cases where a specific protein is assigned to more than one spot, the particular spots are indicated by an ordering letter. Statistically not significant values are indicated by light grey boxes. For the corresponding transcriptome data please refer to Figure 7.

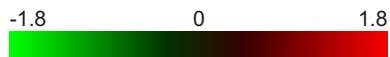

(A)

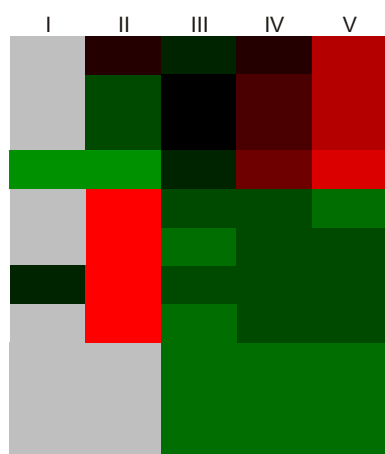

BLi00444 multiple monosaccharide ABC transporter membrane protein  
 \* BLi00442 monosaccharide ABC transporter substrate-binding protein  
 BLi00443 multiple monosaccharide ABC transporter ATP-binding protein  
*yticQ1* carbohydrate ABC transporter substrate-binding protein  
*msmX* carbohydrate ABC transporter ATP-binding protein  
*amyD* carbohydrate ABC transporter permease  
*msmE* carbohydrate ABC transporter substrate-binding protein  
*amyC* carbohydrate ABC transporter permease  
*ganQ* carbohydrate ABC transporter permease  
*ganP* carbohydrate ABC transporter permease  
*cycB* carbohydrate ABC transporter ATP-binding protein

(B)

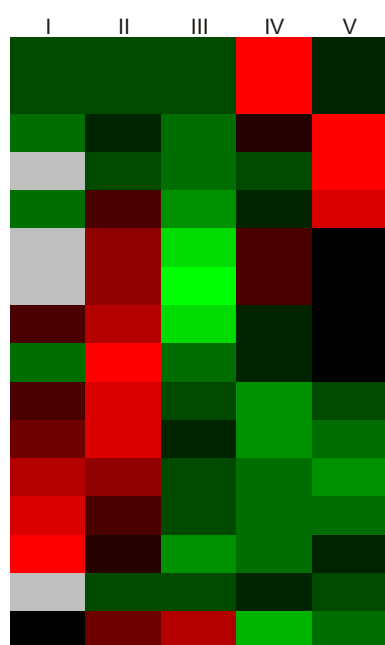

BLi02505 putative lactose/cellobiose-specific phosphotransferase system EIIC comp.  
 BLi02506 putative lactose/cellobiose-specific phosphotransferase system EIIB comp.  
*murP* N-acetyl muramic acid-specific phosphotransferase system EIIBC comp.  
 \* *ptsG* trigger enzyme glucose-specific phosphotransferase system EIICBA comp.  
*nagP* N-acetylglucosamine-specific phosphotransferase system EIICB comp.  
*ulaA* ascorbate-specific phosphotransferase system EIIC comp.  
 BLi00493 putative ascorbate-specific phosphotransferase system EIIB comp.  
*licB* trigger enzyme lichenan-specific phosphotransferase system EIIB comp.  
*licC* lichenan-specific phosphotransferase system EIIC comp.  
*licA* lichenan-specific phosphotransferase system EIIA comp.  
 BLi03866 sorbitol-specific phosphotransferase system EIIC comp.  
 BLi03865 sorbitol-specific phosphotransferase system EIIBC comp.  
 BLi03864 putative sorbitol-specific phosphotransferase system EIIA comp.  
*fruA* fructose-specific phosphotransferase system EIABC comp.  
*bgIP* trigger enzyme beta-glucoside-specific phosphotransferase system EIIBCA comp.  
 \* *ypqE* putative phosphotransferase system EIIA comp.



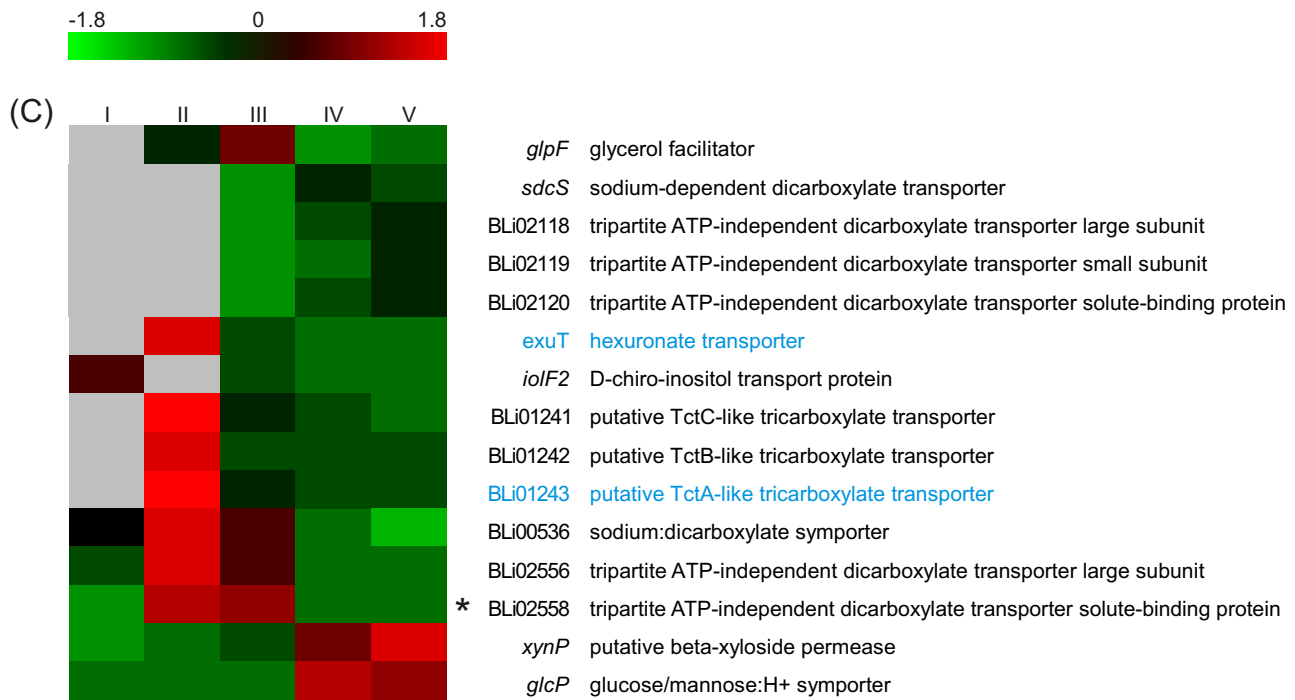

**Figure S6 Carbohydrate transport.** Heat map representation of Z-score transformed NPKM values. The depicted genes have been annotated as **(A)** carbohydrate ABC transporter components, **(B)** phosphotransferase system EII components and **(C)** further carbohydrate transporters. Please note that the figure does not give a complete list of genes involved in carbohydrate transport. Genes with an assigned antisense RNA [1] are marked in blue, asterisks indicate a detected protein spot for the respective gene (Additional File 2: Table S3) and statistically not significant values are marked by grey boxes.

At sampling point II, the transcript abundances indicate the consumption of the previously synthesized acetate (Figure 7). These results are supported by RNA abundance shifts of associated transporters. The transcript of a tripartite ATP-independent periplasmic dicarboxylate transporter (TRAP) of the TAXI type (BLi02556 and BLi02558), which is suggested as capable of acetate transport [3], is highly abundant.

During the late production stages, transcripts of transporters of diverse sugars (GlcP, XynP, BglP, SdcS) and cell wall components (MurP, NagP) are abundant. It is likely that this reaction can be accounted to the availability of such compounds due to cell lysis, as for example described at the onset of sporulation in *B. subtilis* [4], or shear effects in the fermenter.

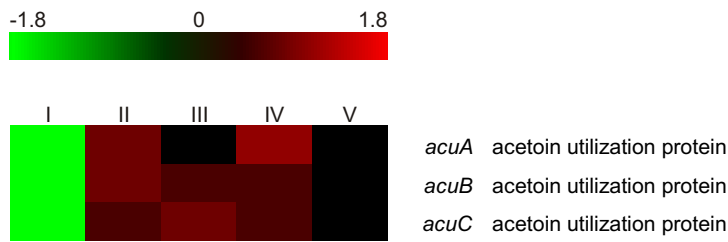

**Figure S7 Acetoin utilization operon *acuABC*.** Heat map representation of Z-score transformed NPKM values. The depicted genes are annotated as acetoin utilization operon *acuABC*.

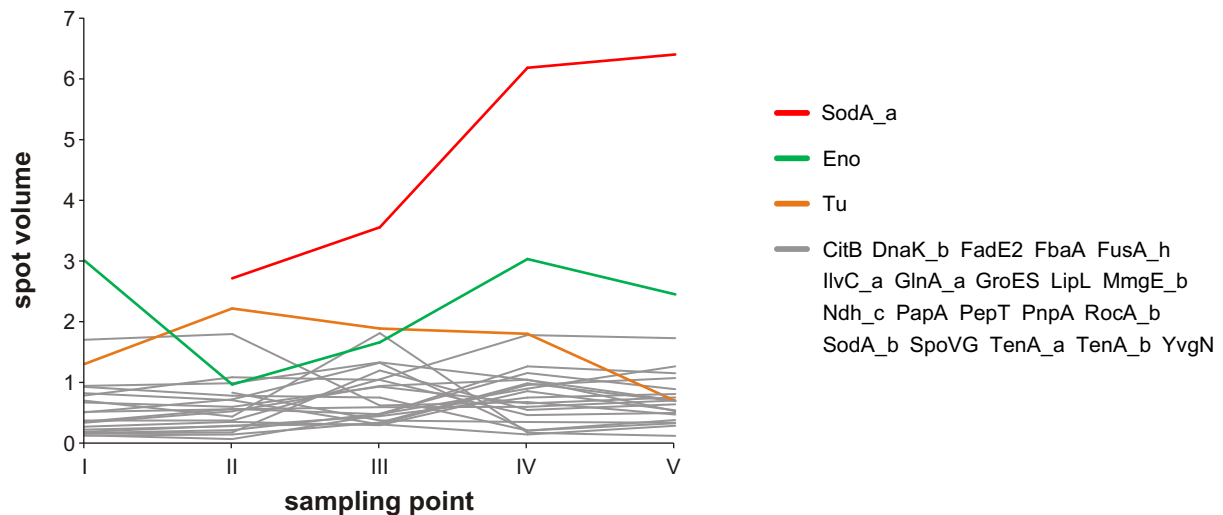

**Figure S8 Most abundant proteins.** Mean spot volumes of the most abundant proteins are plotted against sampling points (see also Additional File 2: Table S3). Grey lines represent protein spot volumes either higher than 0.8% at one sampling point or higher than 0.5% at all sampling points. Lines colored green, red and orange indicate the three most abundant protein spots Eno, Tu and SodA\_a. In case a specific protein can be assigned to more than one spot, the particular spot is indicated by an ordering letter. Please note that statistically not significant values are not shown.

Highly abundant transcripts (Figure 2) for which predominant proteins could also be observed are coding for SodA, Tu and SpoVG. Other strongly synthesized proteins are, for example, the enolase Eno and proteins involved in carbon and amino acid metabolism or cofactor synthesis. They also comprise peptidases, the heat shock proteins GroES and DnaK and elongation factor G. Protein spots corresponding to the strongly transcribed genes *lanA1* and *lanA2* could not be identified. This was expected, as these proteins are probably exported by ABC transporters [5] and thus cannot be detected by proteome analysis of cytoplasmic proteins. The findings of highly abundant proteins match the results for *B. licheniformis* shown by Voigt et al. [6]. The only major exception is the absence of the flagellin protein Hag, which is also not highly abundant on transcript level. This effect is due to repression of *hag* gene expression in the presence of amino acids [7].

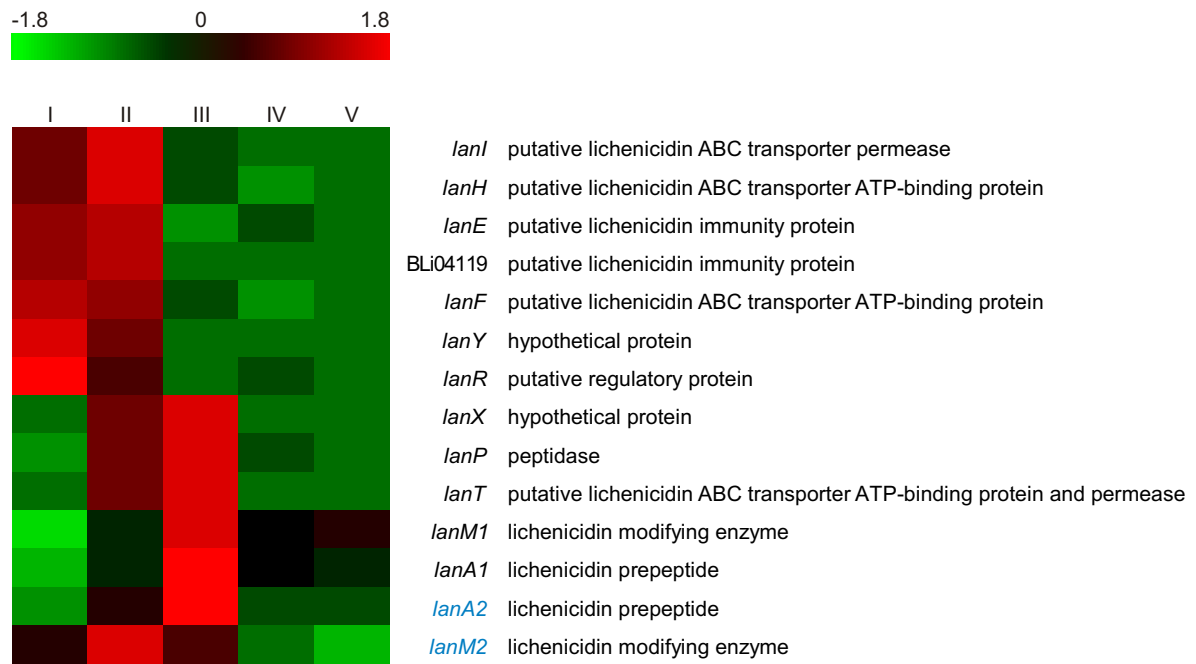

**Figure S9 Lichenicidin gene cluster.** Heat map representation of Z-score transformed NPKM values. The depicted genes have been identified as two-peptide lantibiotic lichenicidin-processing gene cluster Lan in *B. licheniformis* [5, 8]. Genes with an assigned antisense RNA [1] are marked in blue.

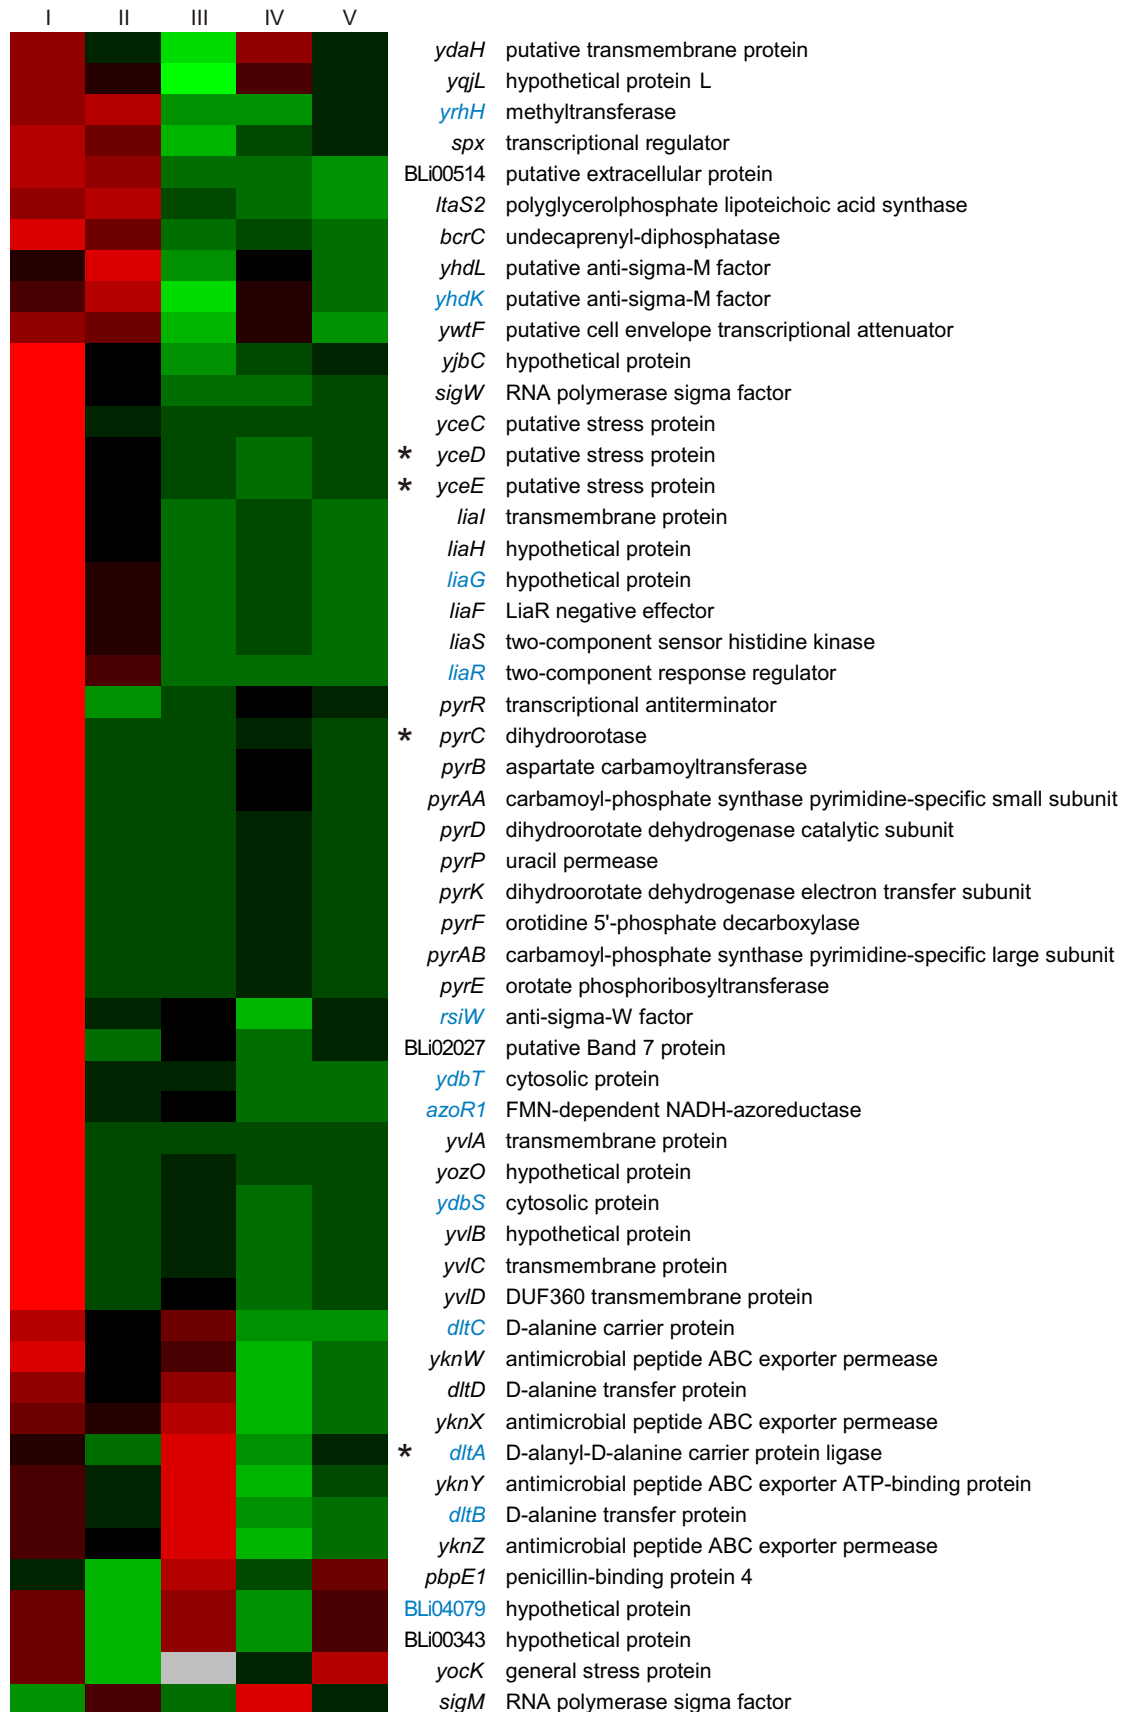

**Figure S10 Cell envelope stress response.** Heat map representation of Z-score transformed NPKM values. The depicted genes have been identified as marker genes for the *B. licheniformis* cell envelope stress response by Wecke et al. [9]. Genes with an assigned antisense RNA [1] are marked in blue, asterisks indicate a detected protein spot for the respective gene (Additional File 2: Table S3) and statistically not significant values are marked by grey boxes. The genes *yvnB*, *sigY*, *pbpX* and *ylCDEFG* are not shown due to lacking transcript abundances (NPKM values <10).

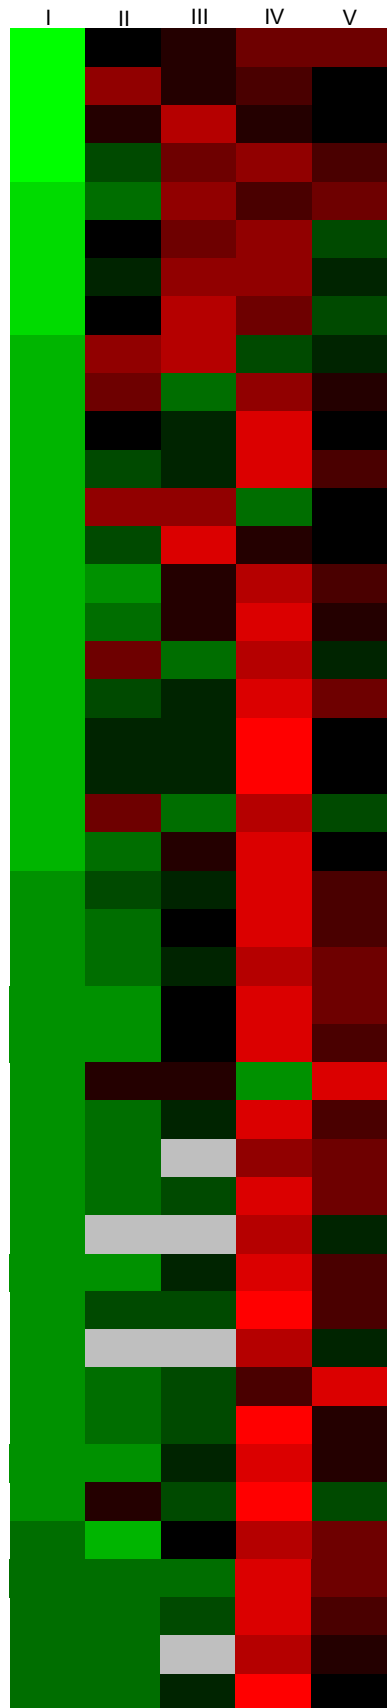

- ynfE* hypothetical protein
- yteT* oxidoreductase
- spoVG* putative septation protein
- divIC* cell division initiation protein
- sspH* small acid-soluble spore protein
- dapG* aspartokinase
- yusW* hypothetical protein
- dapA1* dihydrodipicolinate synthase
- bdbD* thiol-disulfide oxidoreductase
- ylmC* hypothetical protein
- cgeE* N-acetyltransferase involved in spore outer layer maturation
- ykwB* putative N-acetyltransferase
- bdbC* thiol-disulfide oxidoreductase
- yumB* putative NADH dehydrogenase
- sigF* RNA polymerase sigma factor
- spollAB* anti-sigma-F factor
- spoVS* stage V sporulation protein
- yoaW* hypothetical protein
- asd* aspartate-semialdehyde dehydrogenase
- yabR* putative S1 RNA-binding domain protein
- lysA* diaminopimelate decarboxylase
- lipC* spore germination lipase
- yfiN* putative beta-lactamase-like protein
- spollAA* anti-sigma-F factor antagonist
- ydcA* putative transmembrane protein
- yodL* hypothetical protein
- spollB* stage II sporulation protein
- ctaA* heme A synthase
- ylbB* hypothetical protein
- spollR* stage II sporulation protein
- spoVK* stage V sporulation protein
- cotJB* spore coat peptide assembly protein
- yqhP* hypothetical protein
- ylbC* hypothetical protein
- cotJA* spore coat associated protein
- ybaK* hypothetical protein
- glgP* glycogen phosphorylase
- sigG* RNA polymerase sigma factor
- ypeP* putative ribonuclease
- ytpP* transcriptional regulator
- yngK* hypothetical protein
- ytvB* transmembrane protein
- spollIAB* stage III sporulation protein
- yabQ* spore protein

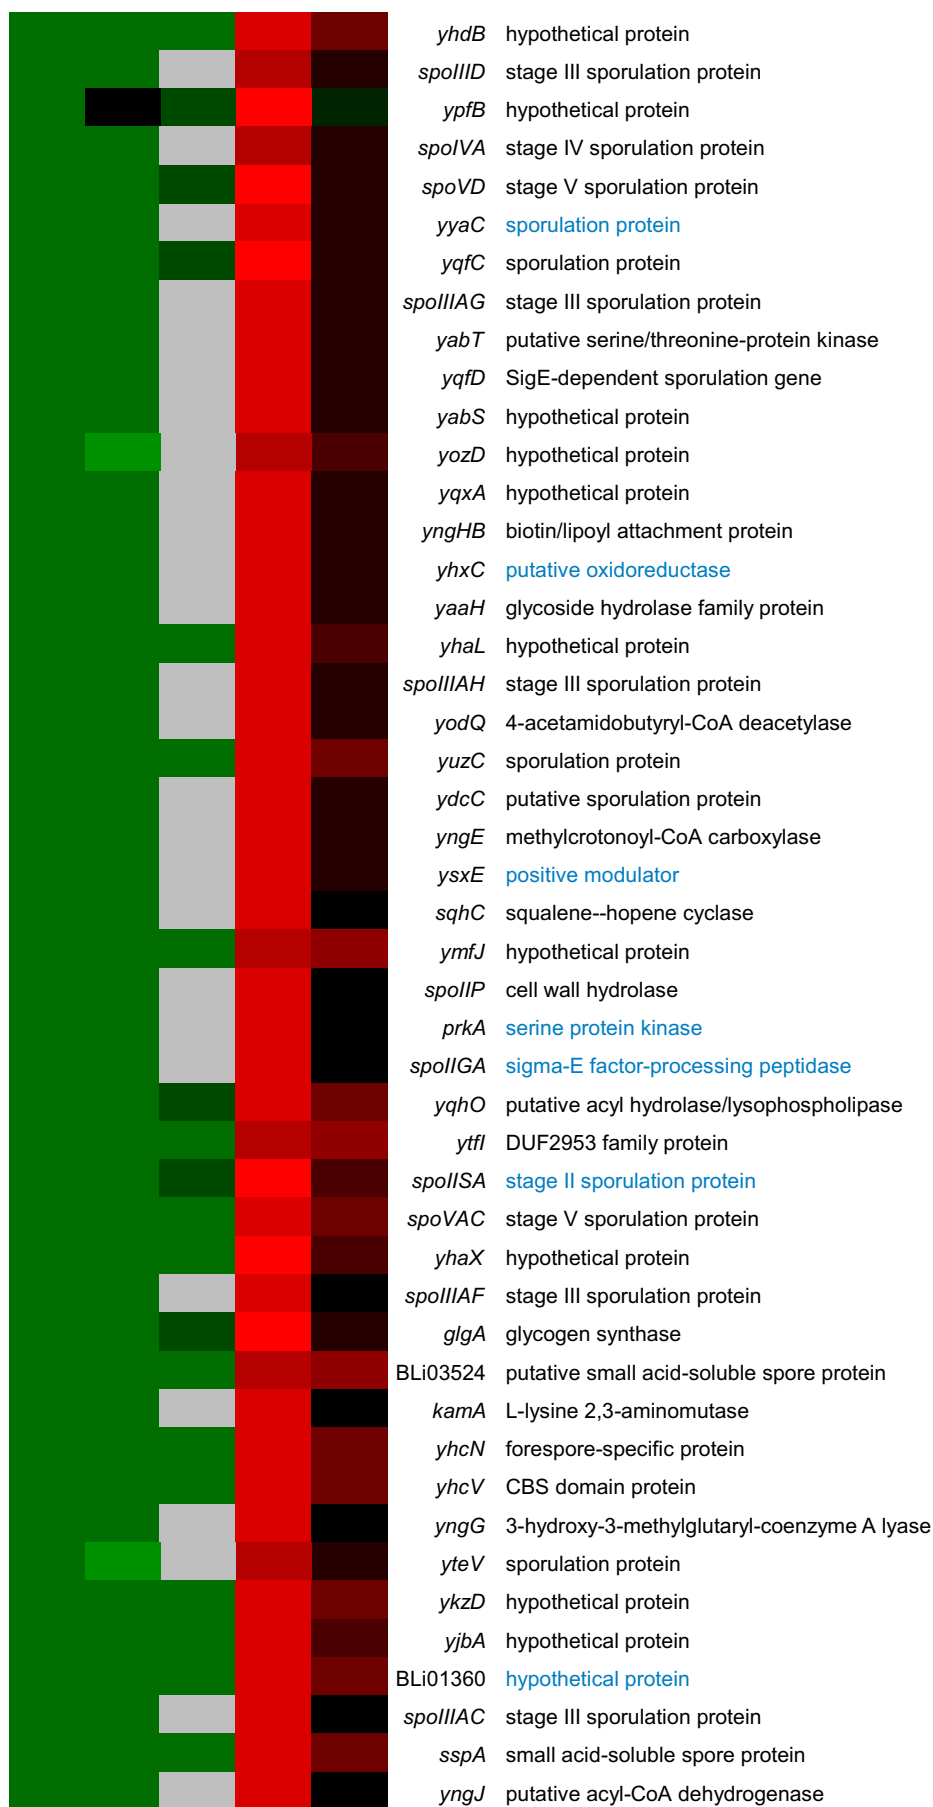

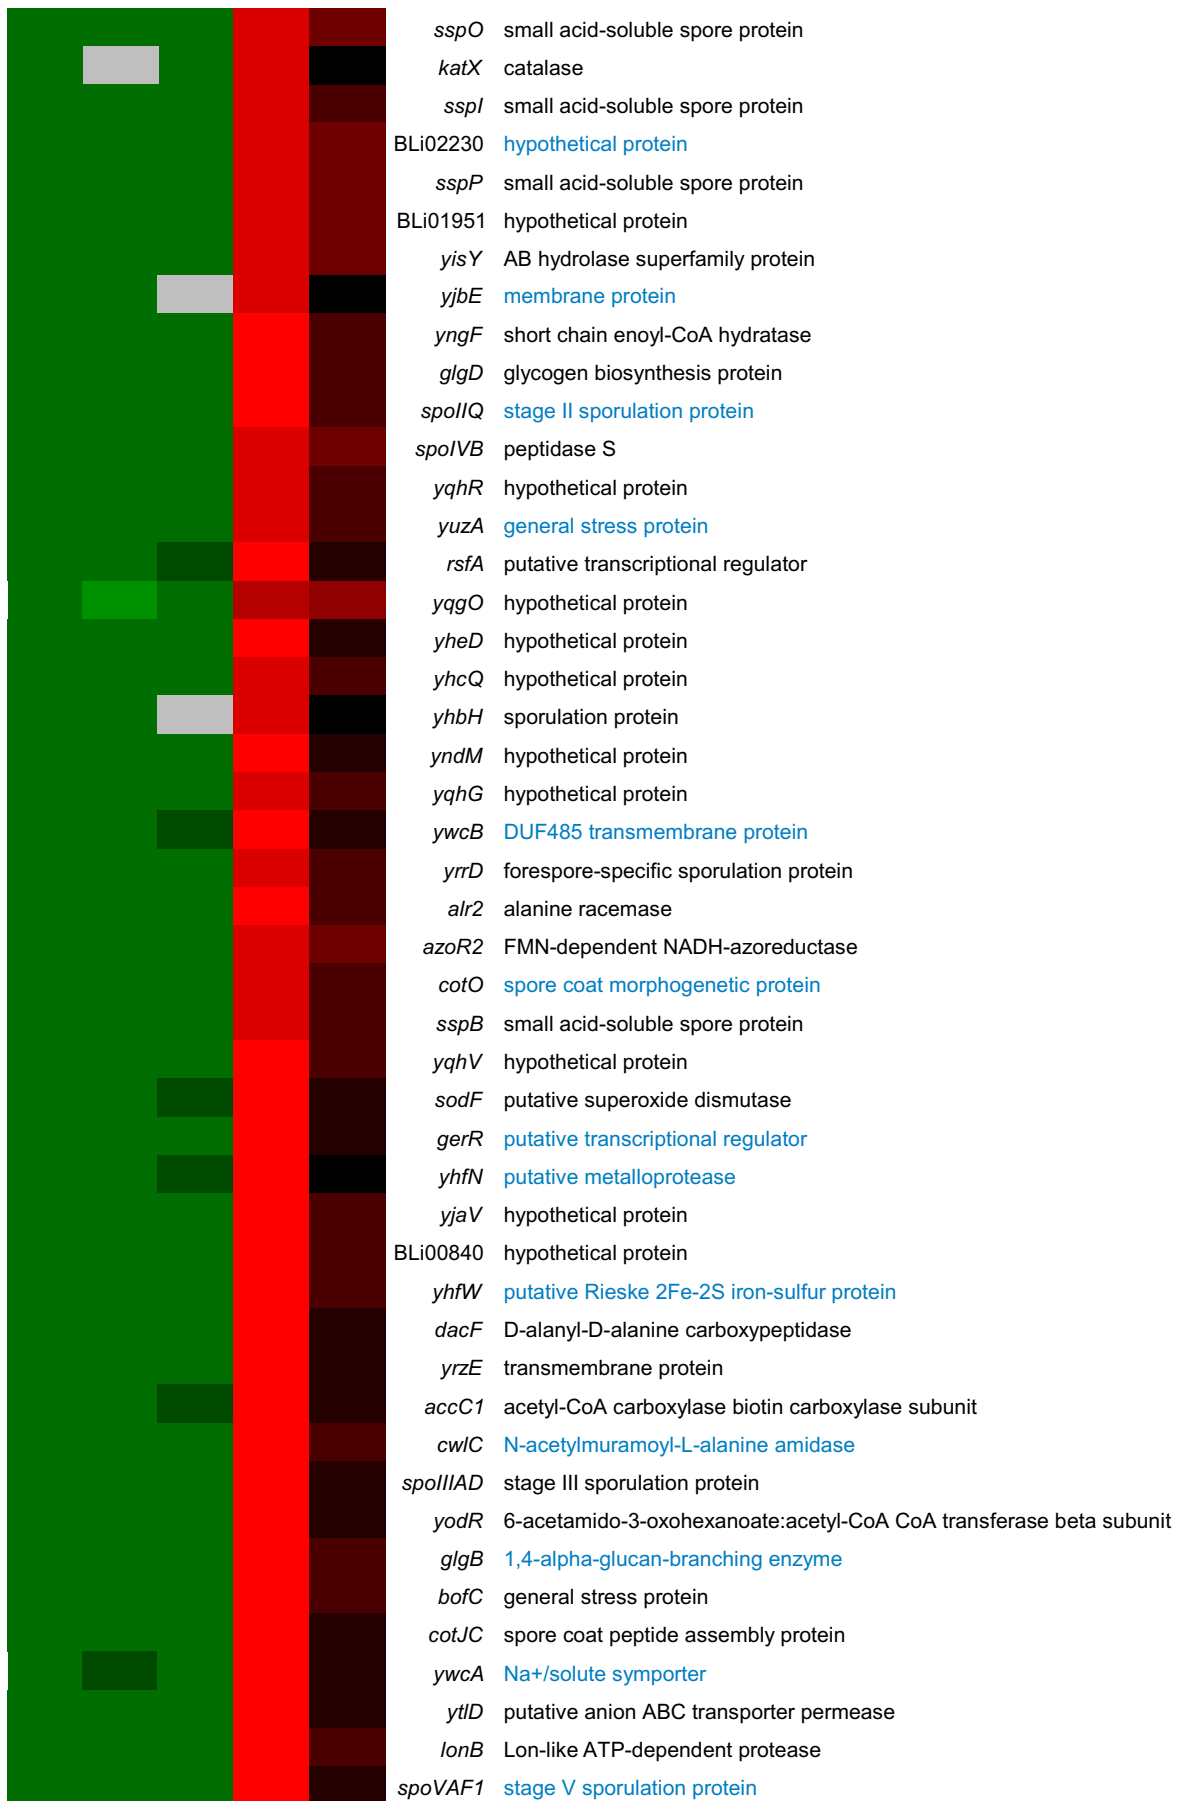



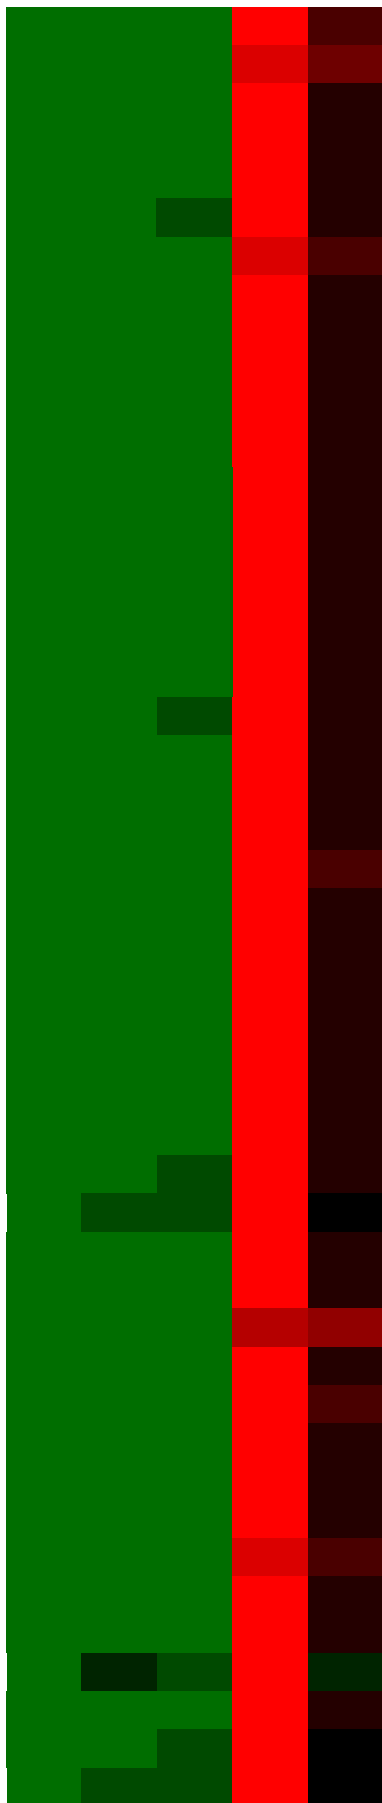

|                 |                                                                     |
|-----------------|---------------------------------------------------------------------|
| <i>yurZ</i>     | putative alkylhydroperoxidase                                       |
| <i>yoaR</i>     | hypothetical protein                                                |
| <i>spoIVFB</i>  | stage IV sporulation protein                                        |
| <i>sspK</i>     | small acid-soluble spore protein                                    |
| <i>ytrH</i>     | <a href="#">sporulation membrane protein</a>                        |
| <i>ytrI</i>     | <a href="#">sporulation membrane protein</a>                        |
| <i>dacB</i>     | <a href="#">D-alanyl-D-alanine carboxypeptidase</a>                 |
| <i>yutH</i>     | spore coat protein                                                  |
| <i>ycgF</i>     | putative amino acid efflux protein                                  |
| <i>spoIIIAE</i> | stage III sporulation protein                                       |
| <i>spoIIIAA</i> | stage III sporulation protein                                       |
| <i>ylaJ</i>     | <a href="#">hypothetical protein</a>                                |
| <i>spoIVFA</i>  | stage IV sporulation protein                                        |
| <i>yusN</i>     | putative spore coat protein                                         |
| <i>spmB</i>     | <a href="#">spore maturation protein</a>                            |
| <i>yodT</i>     | N(6)-acetyl-beta-lysine transaminase precursor                      |
| <i>yodP</i>     | <a href="#">beta-lysine acetyltransferase</a>                       |
| <i>ydhD</i>     | putative sporulation-specific glycosylase                           |
| <i>pdaB</i>     | polysaccharide deacetylase                                          |
| <i>ytIC</i>     | putative anion ABC transporter ATP-binding protein                  |
| <i>ylzJ</i>     | hypothetical protein                                                |
| <i>yheC</i>     | hypothetical protein                                                |
| <i>yuiC</i>     | sporulation protein                                                 |
| <i>ytIA</i>     | putative anion ABC transporter substrate-binding protein            |
| <i>spoVAA</i>   | stage V sporulation protein                                         |
| <i>yodS</i>     | 6-acetamido-3-oxohexanoate:acetyl-CoA CoA transferase alpha subunit |
| <i>yknT</i>     | <a href="#">putative sporulation protein</a>                        |
| <i>asnO</i>     | asparagine synthase                                                 |
| <i>cotF</i>     | spore coat protein                                                  |
| <i>yqfT</i>     | <a href="#">hypothetical protein</a>                                |
| <i>glgC</i>     | glucose-1-phosphate adenyltransferase                               |
| <i>gin</i>      | forespore-specific protein                                          |
| <i>spoIIM</i>   | stage II sporulation protein                                        |
| <i>pbpG</i>     | <a href="#">penicillin-binding protein 2D</a>                       |
| <i>sspF</i>     | small acid-soluble spore protein                                    |
| <i>yraD</i>     | spore coat protein F-like protein                                   |
| <i>yteA</i>     | <a href="#">sporulation protein</a>                                 |
| <i>yjcA</i>     | sporulation protein                                                 |
| <i>tgl</i>      | <a href="#">protein-glutamine gamma-glutamyltransferase</a>         |
| <i>ydfS</i>     | <a href="#">UPF0702 transmembrane protein</a>                       |
| <i>seaA</i>     | spore envelope assembly protein                                     |
| <i>yokU</i>     | hypothetical protein                                                |
| <i>yitG</i>     | putative major facilitator superfamily protein                      |
| <i>yqhQ</i>     | hypothetical protein                                                |
| <i>yitD</i>     | <a href="#">phosphosulfolactate synthase</a>                        |
| <i>yIbJ</i>     | <a href="#">putative sporulation integral membrane protein</a>      |
| <i>ytlI</i>     | <a href="#">sporulation integral membrane protein</a>               |

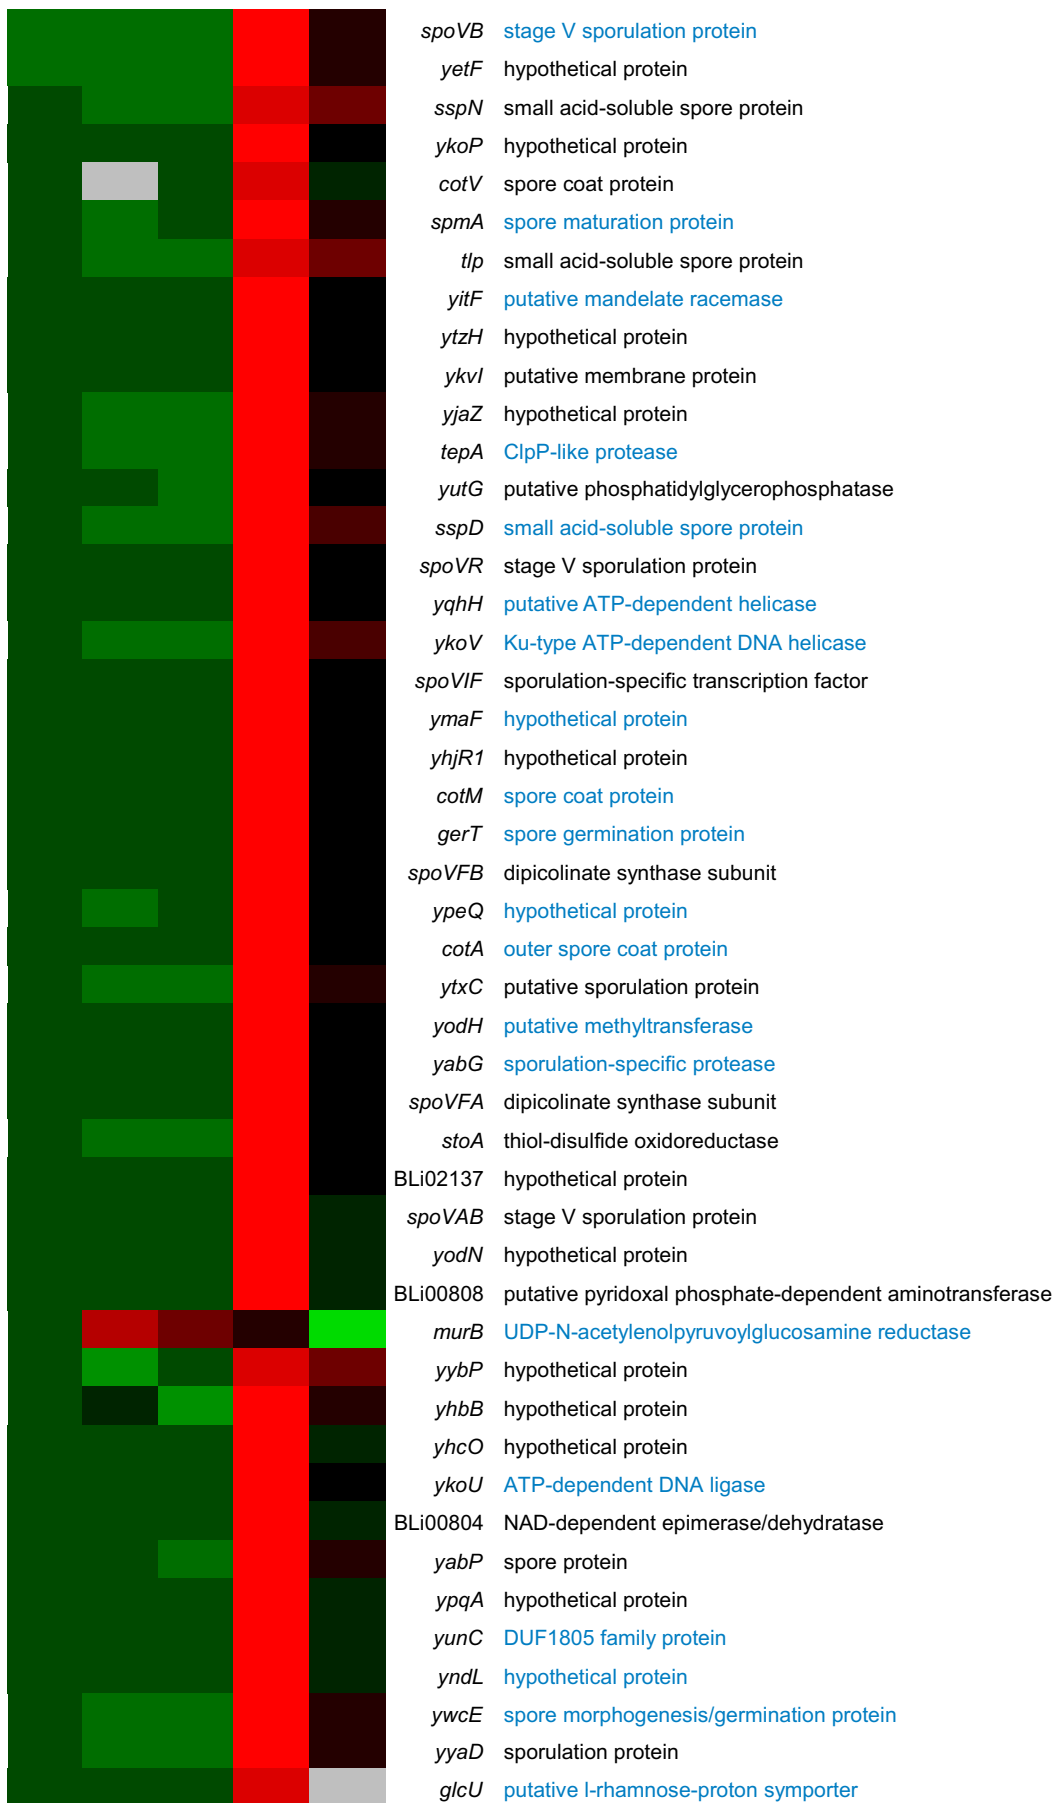

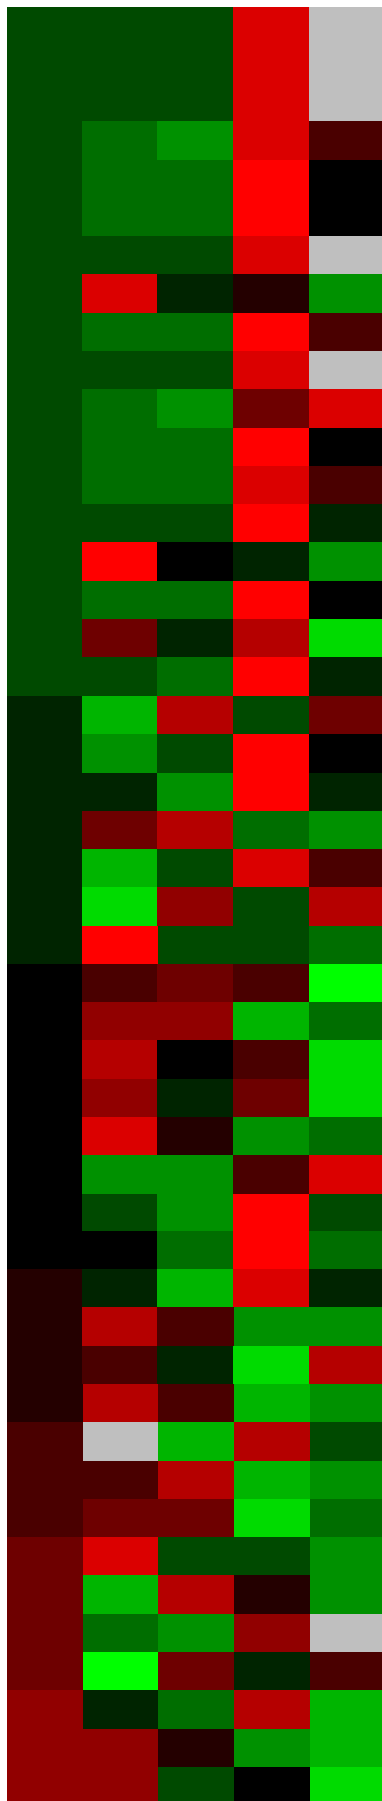

|               |                                                                                                                     |
|---------------|---------------------------------------------------------------------------------------------------------------------|
| <i>yitE</i>   | UPF0750 membrane protein                                                                                            |
| <i>ytzC</i>   | DUF2524 family protein                                                                                              |
| <i>lytH</i>   | peptidoglycan hydrolase                                                                                             |
| <i>yphA</i>   | putative membrane protein                                                                                           |
| <i>yueG</i>   | spore germination protein                                                                                           |
| <i>pbpI</i>   | sporulation-specific penicillin-binding protein 4b                                                                  |
| <i>adhB</i>   | alcohol dehydrogenase-like protein                                                                                  |
| <i>phoR</i>   | two-component sensor histidine kinase                                                                               |
| <i>cotE</i>   | spore coat protein                                                                                                  |
| <i>yutC</i>   | putative sporulation lipoprotein                                                                                    |
| <i>yzkE</i>   | hypothetical protein                                                                                                |
| <i>spolID</i> | stage II sporulation protein                                                                                        |
| <i>ykuS</i>   | UPF0180 family protein                                                                                              |
| <i>cotH</i>   | inner spore coat protein                                                                                            |
| <i>ftsK</i>   | DNA translocase                                                                                                     |
| <i>yhfA</i>   | putative membrane protein                                                                                           |
| <i>ypjB</i>   | sporulation protein                                                                                                 |
| <i>ldt</i>    | putative L,D-transpeptidase                                                                                         |
| <i>clpC</i>   | ATP-dependent Clp protease ATP-binding subunit                                                                      |
| <i>bofA</i>   | pro-sigmaK processing inhibitor                                                                                     |
| <i>ycgL</i>   | hypothetical protein                                                                                                |
| <i>jag</i>    | hypothetical protein                                                                                                |
| <i>cwJ</i>    | cell wall hydrolase                                                                                                 |
| <i>disA</i>   | DNA integrity scanning protein                                                                                      |
| <i>exuR</i>   | HTH-type transcriptional repressor                                                                                  |
| <i>ylxW</i>   | DUF881 family protein                                                                                               |
| <i>spolIJ</i> | membrane protein translocase                                                                                        |
| <i>divIB</i>  | division initiation protein                                                                                         |
| <i>murG</i>   | UDP-N-acetylglucosamine--N-acetylmuramyl-(pentapeptide) pyrophosphoryl-undecaprenol N-acetylglucosamine transferase |
| <i>spo0J</i>  | stage 0 sporulation protein                                                                                         |
| <i>ytkD</i>   | nucleoside triphosphatase                                                                                           |
| <i>yyxA</i>   | putative serine protease                                                                                            |
| <i>spoVE</i>  | stage V sporulation protein                                                                                         |
| <i>mbI</i>    | cell-shape determining protein                                                                                      |
| <i>ispG</i>   | 4-hydroxy-3-methylbut-2-en-1-yl diphosphate synthase                                                                |
| BLi03803      | NAD-dependent epimerase/dehydratase                                                                                 |
| <i>soj</i>    | sporulation initiation inhibitor protein                                                                            |
| <i>ykoY</i>   | putative membrane protein                                                                                           |
| BLi03150      | hypothetical protein                                                                                                |
| <i>ftsY</i>   | cell division protein                                                                                               |
| <i>pbpF</i>   | penicillin-binding protein 2C                                                                                       |
| <i>yeaA</i>   | hypothetical protein                                                                                                |
| <i>splA</i>   | transcriptional repressor                                                                                           |
| <i>mcsB</i>   | modulator                                                                                                           |
| <i>ytaF</i>   | putative sporulation protein                                                                                        |
| <i>nfo</i>    | endonuclease 4                                                                                                      |
| <i>subA</i>   | suppressor                                                                                                          |

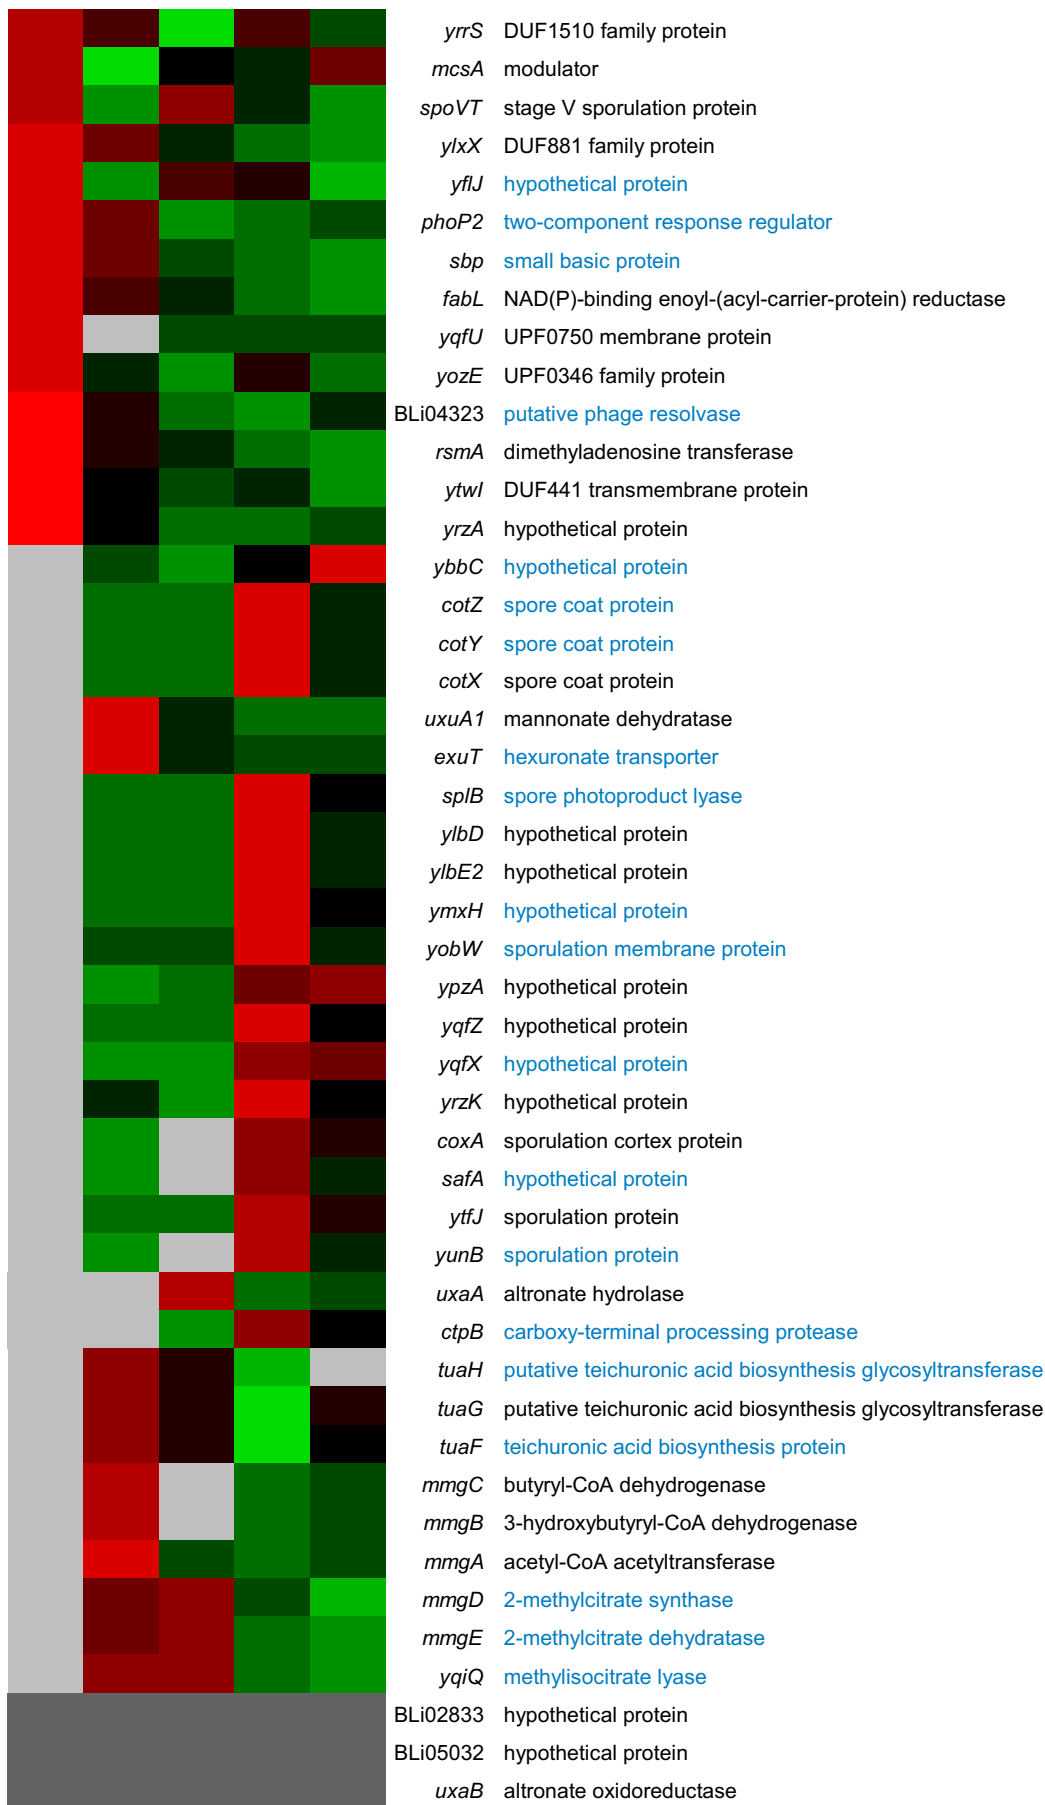

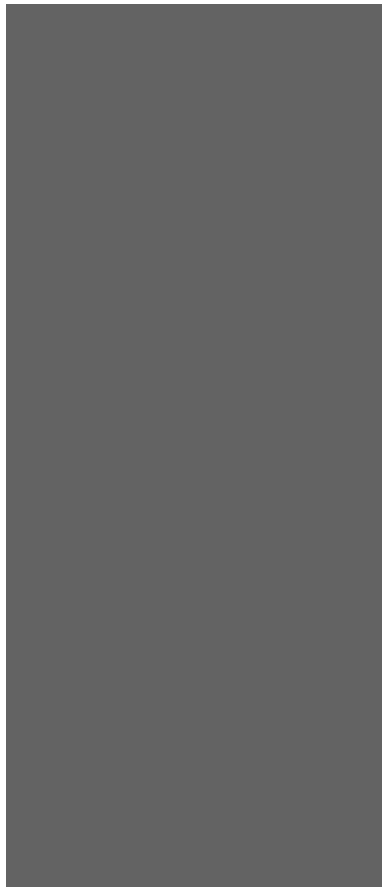

*yaaC* hypothetical protein  
*ybxH* hypothetical protein  
*ydfR* DUF421 transmembrane protein  
*yfhS* hypothetical protein  
*yfkE* H+/Ca<sup>2+</sup> exchanger  
*yhcT* putative pseudouridine synthase  
*yhdC* hypothetical protein  
*ysisN* DUF2777 family protein  
*yjfA* hypothetical protein  
*ykjA* UPF0702 transmembrane protein  
*ykoN* glycosyltransferase  
*ykoQ* putative metallo-dependent phosphatase  
*ykoS* hypothetical protein  
*ylyA* hypothetical protein  
*yngL* putative membrane protein  
*yppC* hypothetical protein  
*yqgE* putative major facilitator superfamily protein  
*yqzG* hypothetical protein  
*yrbG* DUF421 transmembrane protein  
*yrrI* UPF0118 transmembrane protein  
*yveA* aspartate-proton symporter  
*ywaF* transmembrane protein  
*ywjE* putative minor cardiolipin synthase

**Figure S11 Sporulation.** Heat map representation of Z-score transformed NPKM values. The depicted genes were identified as members of the sporulation cascade by reciprocal BLAST analysis [10] between *B. licheniformis* genes [1] and *B. subtilis* genes assigned to sporulation [11]. Genes with an assigned antisense RNA [1] are marked in blue, genes with NPKM values <10 at all sampling points are indicated by dark grey boxes, and statistically not significant values are indicated by light grey boxes.

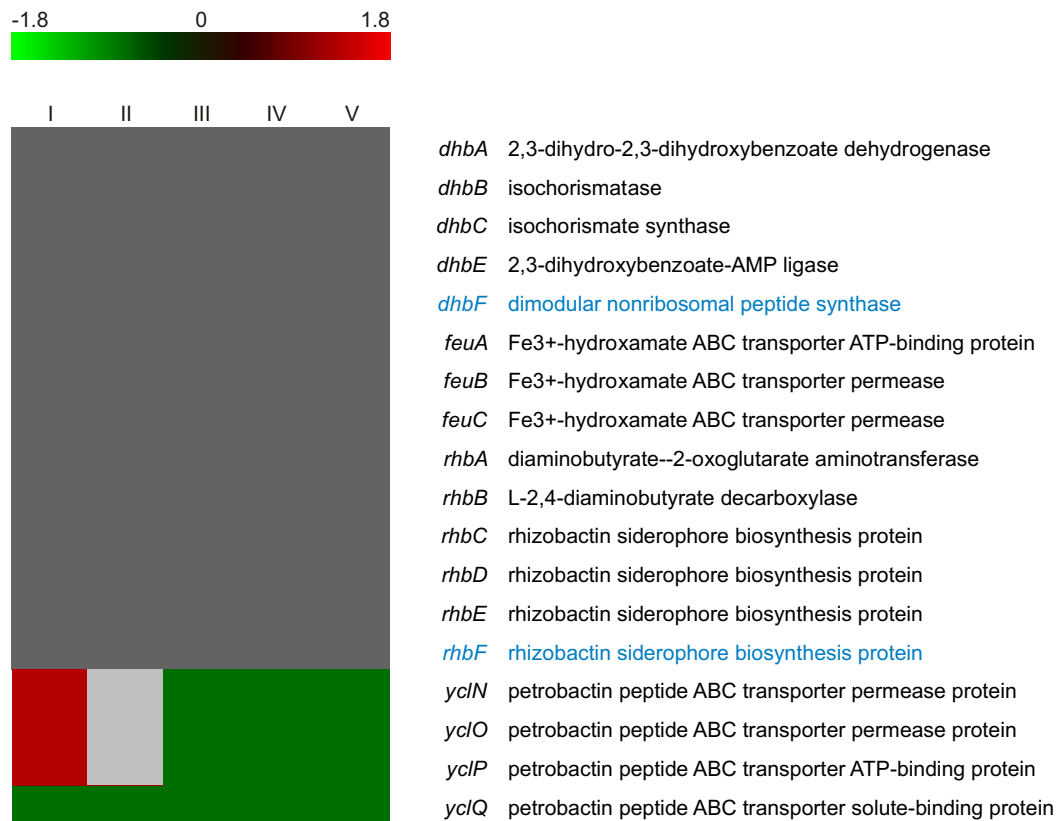

**Figure S12 Iron starvation.** Heat map representation of Z-score transformed NPKM values. The depicted genes have been identified as marker genes for *B. licheniformis* iron starvation by Nielsen et al. [12]. Genes with an assigned antisense RNA [1] are marked in blue, genes with NPKM values <20 at all sampling points are indicated by dark grey boxes and statistically not significant values are indicated by light grey boxes.

A well described indicator for iron starvation is the induction of siderophore anabolic genes (*dhbABCEF* and *rhbCDEF*) and siderophore importer genes (*feuABC* and *yclNOPQ*) [12], which are under control of the transcriptional regulator Fur [13]. With exception of the Ycl operon, these transcripts of these genes are not abundant during the fermentation process. This behavior indicates that iron starvation does not occur in any of the examined fermentation phases and corresponds to the observation that the Fur regulon is only induced during growth in minimal medium with restricted iron supply but not in rich medium [12, 14, 15], as used in this study.

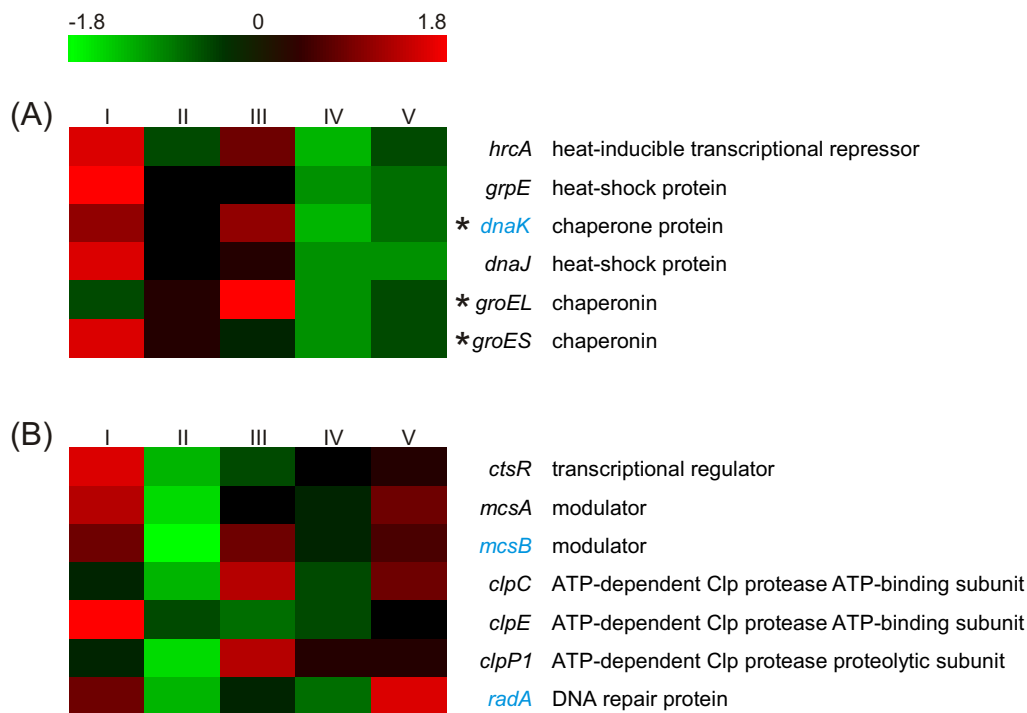

**Figure S13 Heat shock response.** Heat map representation of Z-score transformed NPKM values. The depicted (A) HrcA and (B) CtsR regulons have been identified as *B. licheniformis* heat stress markers by Nielsen et al. [12]. Genes with an assigned antisense RNA [1] are marked in blue, asterisks indicate a detected protein spot for the respective gene (Additional File 2: Table S3).

In cases of heat shock in *B. licheniformis*, the HrcA regulon including the *dnaK* and the *groE* operons and the CtsR regulon have been shown to be induced [12]. Furthermore, genes involved in iron and purine metabolism were upregulated, whereas the ABC transporter encoding *ytrABCEF* operon was repressed [12]. Since the here analyzed fermentation was not performed under heat shock conditions, the data did not show a typical heat shock response. Nevertheless, a transcriptional reaction to the fermentation temperature of 39 °C cannot be excluded, as the responses between moderate and severe heat shock can differ remarkably [16]. Despite the constant and moderate process temperature, differential expression of genes involved in a classic heat shock response [12, 17, 18] was observed. The ATP-dependent ClpCP protease shows changes in transcript abundance. However, the enzyme has been reported to be involved in proteolysis of misfolded proteins, which were caused by a variety of different stressors [19, 20] including for example the mentioned oxidative stress [14, 21, 22]. A reaction to non-heat stressors is also known for the chaperonins GroEL and GroES [23–25], which were transcribed with NPKM values >1000 at all sampling points or sampling point I, respectively. Although both chaperonins are encoded by the *groE* operon, the ratio of the transcript levels of the genes is highly variable between sampling points I and III – whereas *groES* declines over time, the *groEL* transcripts seem to be increasing. An explanation might be the processing of the bicistronic transcript into two monocistronic mRNAs. This effect has been described for *Agrobacterium tumefaciens* [26], in which the accumulation of *groEL* over time could also be shown. Furthermore, the determined GroEL protein amount (Additional File 2: Table S3) does not correlate with the amount of *groEL* mRNA, but shows the strongest abundance of protein at sampling point I.

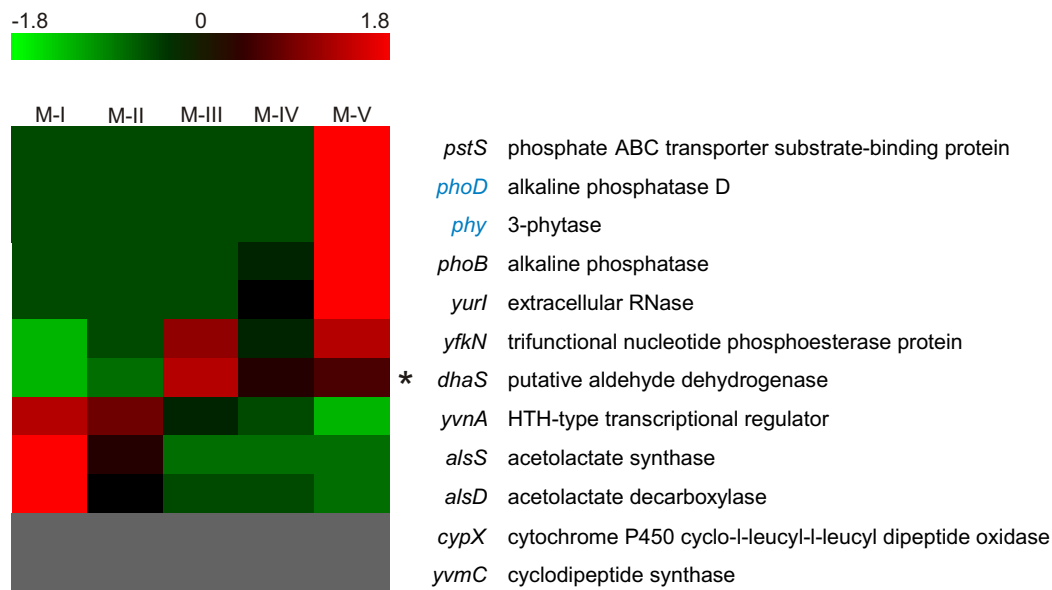

**Figure S14 Phosphate starvation response.** Heat map representation of Z-score transformed NPKM values. The depicted genes have been identified as marker genes for the *B. licheniformis* phosphate starvation response by Hoi et al. [27]. The figure shows the transcript abundances of those marker genes within the fermentation samples of one replicate (replicate M). Genes with an assigned antisense RNA [1] are marked in blue; asterisks indicate a detected protein spot for the respective gene Additional File 2: Table S3. Genes with NPKM values <10 at all sampling points are indicated by dark grey boxes.

At sampling point V, transcripts of *pstS* and the downstream *pst* operon encoding a phosphate ABC transporter (see also Figure 3), but also of *phy*, *phoB*, *phoD*, and *yfnK* are highly abundant. All of the mentioned genes are members of the Pho regulon, also known to provide a specific phosphate starvation stress response in *B. subtilis* [28, 29]. Furthermore, *yurI* and *dhaS* abundant as described by Hoi et al [27], supporting the inference of a phosphate shortage in this sample. However, no corresponding transcriptional response could be observed for the other fermentation samples (L and R) of sampling point V. This disparity coincides with an increased partial pressure of oxygen, starting ~1 h ahead of sampling point M-V (Additional File 1: Figure S1), which indicates a decreased metabolic activity in this sample at this fermentation stage. At the same time, the genes *yvnA*, *alsD*, and *alsS* show no increased transcript abundance. This is in accordance with the results obtained by Hoi et al. [27], who observed no induction of these genes in the early phases (~2 h) of declining metabolic activity after phosphate exhaustion. In addition, transcripts of genes involved in metabolic pathways, chemotaxis and especially teichoic acid synthesis were lacking, as also shown before [27]. The transcript abundance of the teichuronic acid synthesis operon (*tuaABCDEFG*), which enables the replacement of phosphate-rich teichoic acids, has been described as additional indicator of phosphate starvation in *B. subtilis* [28, 30] and could also be observed in sample M-V (data not shown). In summary, these results indicate that fermentation M is under phosphate limitation during the latest stage of the process. This finding might be a target for bioprocess optimization aiming at the prolongation of the fermentation process.





## References

1. Wiegand S, Dietrich S, Hertel R, Bongaerts J, Evers S, Volland S, Daniel R, Liesegang H: **RNA-Seq of *Bacillus licheniformis*: active regulatory RNA features expressed within a productive fermentation.** *BMC Genomics* 2013, revised.
2. Detsch C, Stülke J: **Ammonium utilization in *Bacillus subtilis*: transport and regulatory functions of NrgA and NrgB.** *Microbiology+* 2003, **149**:3289–3297.
3. Bakermans C, Sloup RE, Zarka DG, Tiedje JM, Thomashow MF: **Development and use of genetic system to identify genes required for efficient low-temperature growth of *Psychrobacter arcticus* 273-4.** *Extremophiles* 2009, **13**:21–30.
4. González-Pastor JE: **Cannibalism: a social behavior in sporulating *Bacillus subtilis*.** *FEMS Microbiol Rev* 2011, **35**:415–24.
5. Dischinger J, Josten M, Szekat C, Sahl H-G, Bierbaum G: **Production of the novel two-peptide lantibiotic lichenicidin by *Bacillus licheniformis* DSM 13.** *PLoS One* 2009, **4**:e6788.
6. Voigt B, Schweder T, Becher D, Ehrenreich A, Gottschalk G, Feesche J, Maurer K-H, Hecker M: **A proteomic view of cell physiology of *Bacillus licheniformis*.** *Proteomics* 2004, **4**:1465–90.
7. Bergara F, Ibarra C, Iwamasa J, Patarroyo JC, Aguilera R, Ma LM: **CodY Is a Nutritional Repressor of Flagellar Gene Expression in *Bacillus subtilis*.** *J Bacteriol* 2003, **185**:3118–3126.
8. Begley M, Cotter PD, Hill C, Ross RP: **Identification of a novel two-peptide lantibiotic, lichenicidin, following rational genome mining for LanM proteins.** *Appl Environ Microbiol* 2009, **75**:5451–60.
9. Wecke T, Veith B, Ehrenreich A, Mascher T: **Cell envelope stress response in *Bacillus licheniformis*: integrating comparative genomics, transcriptional profiling, and regulon mining to decipher a complex regulatory network.** *J Bacteriol* 2006, **188**:7500–11.
10. Lechner M, Findeiss S, Steiner L, Marz M, Stadler PF, Prohaska SJ: **Proteinortho: detection of (co-)orthologs in large-scale analysis.** *BMC Bioinformatics* 2011, **12**:124.
11. Mäder U, Schmeisky AG, Flórez LA, Stülke J: **SubtiWiki—a comprehensive community resource for the model organism *Bacillus subtilis*.** *Nucleic Acids Res* 2012, **40**:D1278–87.
12. Nielsen AK, Breüner A, Krzystanek M, Andersen JT, Poulsen TA, Olsen PB, Mijakovic I, Rasmussen MD: **Global transcriptional analysis of *Bacillus licheniformis* reveals an overlap between heat shock and iron limitation stimulon.** *J Mol Microbiol Biotechnol* 2010, **18**:162–73.
13. Ollinger J, Song K-B, Antelmann H, Hecker M, Helmann JD: **Role of the Fur Regulon in Iron Transport in *Bacillus subtilis*.** *J Bacteriol* 2006, **188**:3664–3673.
14. Mostertz J, Scharf C, Hecker M, Homuth G: **Transcriptome and proteome analysis of *Bacillus subtilis* gene expression in response to superoxide and peroxide stress.** *Microbiology+* 2004, **150**:497–512.
15. Helmann JD, Wu MFW, Gaballa A, Kobel PA, Morshedi MM, Fawcett P, Paddon C: **The Global Transcriptional Response of *Bacillus subtilis* to Peroxide Stress Is Coordinated by Three Transcription Factors.** *J Bacteriol* 2003, **185**:243.

16. Barreiro C, Nakunst D, Hüser AT, De Paz HD, Kalinowski J, Martín JF: **Microarray studies reveal a “differential response” to moderate or severe heat shock of the HrcA- and HspR-dependent systems in *Corynebacterium glutamicum*.** *Microbiology+* 2009, **155**:359–72.
17. Helmann JD, Wu MFW, Kobel PA, Gamo F-J, Wilson M, Morshedi MM, Navre M, Paddon C: **Global Transcriptional Response of *Bacillus subtilis* to Heat Shock** *J Bacteriol* 2001, **183**:7318.
18. Schumann W: **The *Bacillus subtilis* heat shock stimulon.** *Cell Stress Chaperon* 2003, **8**:207–17.
19. Krüger E, Witt E, Ohlmeier S, Hanschke R, Hecker M: **The Clp proteases of *Bacillus subtilis* are directly involved in degradation of misfolded proteins.** *J Bacteriol* 2000, **182**:3259–65.
20. Frees D, Savijoki K, Varmanen P, Ingmer H: **Clp ATPases and ClpP proteolytic complexes regulate vital biological processes in low GC, Gram-positive bacteria.** *Mol Microbiol* 2007, **63**:1285–95.
21. Leichert LIO, Scharf C, Hecker M: **Global Characterization of Disulfide Stress in *Bacillus subtilis*.** *J Bacteriol* 2003, **185**:1967.
22. Schroeter R, Voigt B, Jürgen B, Methling K, Pöther D-C, Schäfer H, Albrecht D, Mostertz J, Mäder U, Evers S, Maurer K-H, Lalk M, Mascher T, Hecker M, Schweder T: **The peroxide stress response of *Bacillus licheniformis*.** *Proteomics* 2011, **11**:2851–66.
23. Babu MMG, Sridhar J, Gunasekaran P: **Global transcriptome analysis of *Bacillus cereus* ATCC 14579 in response to silver nitrate stress.** *J Nanobiotechnology* 2011, **9**:49.
24. Lee N, Yeo I, Park J, Hahm Y: **Growth inhibition and induction of stress protein, GroEL, of *Bacillus cereus* exposed to antibacterial peptide isolated from *Bacillus subtilis* SC-8.** *Appl Biochem Biotechnol* 2011, **165**:235–42.
25. Seydlová G, Halada P, Fišer R, Toman O, Ulrych A, Svobodová J: **DnaK and GroEL chaperones are recruited to the *Bacillus subtilis* membrane after short-term ethanol stress.** *J Appl Microbiol* 2012, **112**:765–74.
26. Segal G, Ron E: **The *groESL* Operon of *Agrobacterium tumefaciens*: Evidence for Heat Shock-Dependent mRNA cleavage.** *J Bacteriol* 1995, **177**:750–57.
27. Hoi LT, Voigt B, Jürgen B, Ehrenreich A, Gottschalk G, Evers S, Feesche J, Maurer K-H, Hecker M, Schweder T: **The phosphate-starvation response of *Bacillus licheniformis*.** *Proteomics* 2006, **6**:3582–601.
28. Allenby NEE, Connor NO, Prágai Z, Ward C, Wipat A, Harwood CR: **Genome-Wide Transcriptional Analysis of the Phosphate Starvation Stimulon of *Bacillus subtilis*.** *J Bacteriol* 2005, **187**:8063.
29. Antelmann H, Scharf C, Hecker M: **Phosphate Starvation-Inducible Proteins of *Bacillus subtilis*: Proteomics and Transcriptional Analysis.** *J Bacteriol* 2000, **182**:4478.
30. Liu W, Hulett FM: **Comparison of PhoP binding to the *tuaA* promoter with PhoP binding to other Pho-regulon promoters establishes a *Bacillus subtilis* Pho core binding site.** *Microbiology+* 1998, **144**:1443–1450.
31. Palmer T, Berks BC: **The twin-arginine translocation (Tat) protein export pathway.** *Nat Rev Microbiol* 2012, **10**:483–96.

32. DeLisa MP, Samuelson P, Palmer T, Georgiou G: **Genetic analysis of the twin arginine translocator secretion pathway in bacteria.** *J Biol Chem* 2002, **277**:29825–31.
33. Ize B, Gerard F, Zhang M, Chanal A, Voulhoux R, Palmer T, Filloux A, Wu L -F: **In vivo Dissection of the Tat Translocation Pathway in *Escherichia coli*.** *J Mol Biol* 2002, **317**:327–335.
34. Kouwen TRHM, van der Ploeg R, Antelmann H, Hecker M, Homuth G, Mäder U, van Dijl JM: **Overflow of a hyper-produced secretory protein from the *Bacillus* Sec pathway into the Tat pathway for protein secretion as revealed by proteogenomics.** *Proteomics* 2009, **9**:1018–32.
35. Berks BC: **A common export pathway for proteins binding complex redox cofactors?** *Mol Microbiol* 1996, **22**:393–404.
36. Van Dijl JM, Braun PG, Robinson C, Quax WJ, Antelmann H, Hecker M, Müller J, Tjalsma H, Bron S, Jongbloed JDH: **Functional genomic analysis of the *Bacillus subtilis* Tat pathway for protein secretion.** *J Biotechnol* 2002, **98**:243–54.
37. De Vrije GJ, Batenburg AM, Killian JA, De Kruijff B: **Lipid involvement in protein translocation in *Escherichia coli*.** *Mol Microbiol* 1990, **4**:143–150.
